# Supplementary material for: A network of human functional gene interactions from knockout fitness screens in cancer cells
Source: Life Sci Alliance. 2019 Apr 12;2(2):e201800278. doi: 10.26508/lsa.201800278 (PMC6464042; doi:10.26508/lsa.201800278)
Supplement: Supplementary file 1 [file LSA-2018-00278_TableS1.xlsx]

## Sheet: Sheet1
Supplementary Table 1. A summary of screen data
Data Source	Library	Type	Data URL
Meyers et al., 2017	Avana	CRISPR	https://figshare.com/articles/_/5520160
Aguirre et al., 2016	GeCKO v2 (Achilles)	CRISPR	https://portals.broadinstitute.org/achilles
Wang et al., 2014, 2015, 2017	Sabatini	CRISPR	Paper
Koh et al., 2012; Marcotte et al., 2012, 2016; Medrano et al., 2017	Moffat	shRNA	Paper
Tsherniak et al., 2017	Achilles	shRNA	https://portals.broadinstitute.org/achilles
McDonald et al., 2017	DRIVE	shRNA	https://depmap.org/portal/
