# Supplementary material for: A network of human functional gene interactions from knockout fitness screens in cancer cells
Source: Life Sci Alliance. 2019 Apr 12;2(2):e201800278. doi: 10.26508/lsa.201800278 (PMC6464042; doi:10.26508/lsa.201800278)
Supplement: Supplementary file 2 [file LSA-2018-00278_TableS2.xlsx]

## Sheet: Sheet1
Supplementary Table 2. Statistics of 338 cell lines in Avana project data. Four cell lines failed during essentiality calculation process are not presented
Cell line	The number of essential genes (BF>5)	F-measure (BF=5)
A549_LUNG	1830	0.916
CFPAC1_PANCREAS	1657	0.934
CHP212_AUTONOMIC_GANGLIA	1941	0.92
DANG_PANCREAS	1970	0.946
HUPT3_PANCREAS	2035	0.966
KELLY_AUTONOMIC_GANGLIA	1913	0.966
KP2_PANCREAS	1527	0.868
KP3_PANCREAS	1647	0.921
KP4_PANCREAS	1825	0.964
MIAPACA2_PANCREAS	1885	0.974
NCIH1437_LUNG	1780	0.956
NCIH1693_LUNG	1605	0.912
NCIH1792_LUNG	1750	0.92
NCIH1944_LUNG	1831	0.926
NCIH2023_LUNG	1691	0.959
NCIH2030_LUNG	1589	0.903
NCIH2087_LUNG	1693	0.886
NCIH2122_LUNG	1852	0.901
NCIH2126_LUNG	1552	0.868
NCIH2291_LUNG	1479	0.887
NCIH23_LUNG	2344	0.954
NCIH322_LUNG	1904	0.96
NCIH441_LUNG	1983	0.937
PANC0203_PANCREAS	1620	0.912
PANC0403_PANCREAS	1661	0.949
PSN1_PANCREAS	1749	0.787
RERFLCAD1_LUNG	1553	0.913
SKNBE2_AUTONOMIC_GANGLIA	1692	0.934
SNU213_PANCREAS	1654	0.929
TCCPAN2_PANCREAS	1740	0.951
YAPC_PANCREAS	1705	0.935
ABC1_LUNG	1901	0.969
C2BBE1_LARGE_INTESTINE	1709	0.928
CAL51_BREAST	1859	0.95
COLO678_LARGE_INTESTINE	1470	0.845
COV434_OVARY	2001	0.96
D341MED_CENTRAL_NERVOUS_SYSTEM	1731	0.924
ES2_OVARY	1737	0.956
HCC1359_LUNG	1499	0.914
HCC1806_BREAST	1665	0.962
HCC827_LUNG	1863	0.957
HOP62_LUNG	1791	0.909
HT115_LARGE_INTESTINE	1876	0.942
IMR32_AUTONOMIC_GANGLIA	2079	0.792
JHOC5_OVARY	1887	0.942
KARPAS299_HAEMATOPOIETIC_AND_LYMPHOID_TISSUE	1765	0.96
KIJK_HAEMATOPOIETIC_AND_LYMPHOID_TISSUE	1738	0.914
KM12_LARGE_INTESTINE	1666	0.928
KURAMOCHI_OVARY	1613	0.93
LCLC103H_LUNG	1600	0.931
LK2_LUNG	1869	0.941
LXF289_LUNG	1862	0.954
MDST8_LARGE_INTESTINE	1703	0.883
MHHNB11_AUTONOMIC_GANGLIA	1909	0.864
MOLM13_HAEMATOPOIETIC_AND_LYMPHOID_TISSUE	2070	0.948
MORCPR_LUNG	1898	0.942
NB1_AUTONOMIC_GANGLIA	2090	0.844
NB4_HAEMATOPOIETIC_AND_LYMPHOID_TISSUE	1677	0.878
NCIH520_LUNG	1931	0.901
OUMS23_LARGE_INTESTINE	1575	0.878
P31FUJ_HAEMATOPOIETIC_AND_LYMPHOID_TISSUE	1828	0.957
PC14_LUNG	1734	0.965
PK45H_PANCREAS	1421	0.878
SIMA_AUTONOMIC_GANGLIA	1873	0.93
SKNAS_AUTONOMIC_GANGLIA	1800	0.953
SKNMC_BONE	1432	0.818
SNU410_PANCREAS	1450	0.92
SNU8_OVARY	1898	0.968
SUPM2_HAEMATOPOIETIC_AND_LYMPHOID_TISSUE	1905	0.949
T84_LARGE_INTESTINE	1589	0.921
TF1_HAEMATOPOIETIC_AND_LYMPHOID_TISSUE	1857	0.94
THP1_HAEMATOPOIETIC_AND_LYMPHOID_TISSUE	1518	0.929
TOV21G_OVARY	1991	0.959
U937_HAEMATOPOIETIC_AND_LYMPHOID_TISSUE	1908	0.975
786O_KIDNEY	1696	0.937
A2780_OVARY	1727	0.949
AU565_BREAST	1466	0.878
BT549_BREAST	1607	0.929
CAKI1_KIDNEY	1614	0.848
CAL29_URINARY_TRACT	1526	0.911
CAMA1_BREAST	1808	0.873
CAOV3_OVARY	1930	0.897
CCK81_LARGE_INTESTINE	1421	0.672
COV318_OVARY	1286	0.881
COV362_OVARY	1517	0.9
COV504_OVARY	1537	0.943
COV644_OVARY	1312	0.859
D283MED_CENTRAL_NERVOUS_SYSTEM	1512	0.901
DLD1_LARGE_INTESTINE	1806	0.97
EFM19_BREAST	1554	0.874
EFO21_OVARY	1404	0.907
EFO27_OVARY	1551	0.93
EPLC272H_LUNG	1801	0.921
G401_SOFT_TISSUE	1666	0.849
HCC1143_BREAST	1546	0.901
HCC1395_BREAST	1744	0.916
HCC1954_BREAST	1407	0.841
HCC56_LARGE_INTESTINE	1771	0.953
HCC95_LUNG	1664	0.889
HEYA8_OVARY	1611	0.926
HS578T_BREAST	1576	0.933
HS766T_PANCREAS	1675	0.948
HSC3_UPPER_AERODIGESTIVE_TRACT	1473	0.811
HT55_LARGE_INTESTINE	1441	0.885
HUH7_LIVER	1601	0.91
IGR39_SKIN	1447	0.9
JHH5_LIVER	1669	0.943
JHOM1_OVARY	1658	0.904
JHOS4_OVARY	1685	0.94
JIMT1_BREAST	1647	0.948
KMRC1_KIDNEY	1468	0.822
KPL1_BREAST	2106	0.945
KPNYN_AUTONOMIC_GANGLIA	1264	0.69
KYSE70_OESOPHAGUS	1643	0.951
LOVO_LARGE_INTESTINE	1657	0.791
LS1034_LARGE_INTESTINE	1246	0.801
LS180_LARGE_INTESTINE	1507	0.878
LS513_LARGE_INTESTINE	1499	0.874
LUDLU1_LUNG	1407	0.901
MDAMB157_BREAST	1396	0.889
MDAMB231_BREAST	1588	0.94
MDAMB415_BREAST	1521	0.873
MDAMB436_BREAST	1589	0.947
MDAMB453_BREAST	1745	0.921
MDAMB468_BREAST	1353	0.925
MELJUSO_SKIN	1737	0.938
MV411_HAEMATOPOIETIC_AND_LYMPHOID_TISSUE	1809	0.926
NCIH1581_LUNG	1646	0.949
NCIH2170_LUNG	1359	0.878
NCIH460_LUNG	1523	0.921
NCIH716_LARGE_INTESTINE	1402	0.831
NCIH747_LARGE_INTESTINE	1461	0.901
NOMO1_HAEMATOPOIETIC_AND_LYMPHOID_TISSUE	1405	0.837
OE33_OESOPHAGUS	1305	0.89
OV7_OVARY	1056	0.754
OVCAR8_OVARY	1686	0.961
OVISE_OVARY	1927	0.966
OVK18_OVARY	1845	0.963
OVTOKO_OVARY	1028	0.763
PECAPJ34CLONEC12_UPPER_AERODIGESTIVE_TRACT	1757	0.944
RKO_LARGE_INTESTINE	1949	0.973
RMUGS_OVARY	1223	0.806
RT112_URINARY_TRACT	1311	0.879
SKNDZ_AUTONOMIC_GANGLIA	1502	0.921
SKNFI_AUTONOMIC_GANGLIA	880	0.687
SKOV3_OVARY	1399	0.896
SNU201_CENTRAL_NERVOUS_SYSTEM	1619	0.921
SNU349_KIDNEY	1230	0.852
SNU503_LARGE_INTESTINE	1492	0.906
SNU840_OVARY	1912	0.871
SW1463_LARGE_INTESTINE	1464	0.887
SW403_LARGE_INTESTINE	244	0.268
SW620_LARGE_INTESTINE	1834	0.942
SW837_LARGE_INTESTINE	1568	0.931
TE5_OESOPHAGUS	1445	0.798
U251MG_CENTRAL_NERVOUS_SYSTEM	1663	0.944
UACC257_SKIN	1050	0.825
WM793_SKIN	1635	0.944
ZR751_BREAST	1635	0.928
143B_BONE	1431	0.93
42MGBA_CENTRAL_NERVOUS_SYSTEM	1482	0.909
5637_URINARY_TRACT	1659	0.932
59M_OVARY	1474	0.906
639V_URINARY_TRACT	1376	0.934
647V_URINARY_TRACT	1560	0.94
769P_KIDNEY	1577	0.908
8305C_THYROID	1508	0.919
8MGBA_CENTRAL_NERVOUS_SYSTEM	1318	0.872
A2058_SKIN	1540	0.936
AGS_STOMACH	1685	0.921
BC3C_URINARY_TRACT	1489	0.928
BFTC905_URINARY_TRACT	1974	0.949
BFTC909_KIDNEY	1559	0.917
BHY_UPPER_AERODIGESTIVE_TRACT	1568	0.9
BICR22_UPPER_AERODIGESTIVE_TRACT	1720	0.928
BICR6_UPPER_AERODIGESTIVE_TRACT	1620	0.903
C32_SKIN	1434	0.884
CAKI2_KIDNEY	1573	0.836
CAL27_UPPER_AERODIGESTIVE_TRACT	1550	0.915
CAL78_BONE	1376	0.891
CALU6_LUNG	1431	0.908
CAS1_CENTRAL_NERVOUS_SYSTEM	1668	0.889
CCFSTTG1_CENTRAL_NERVOUS_SYSTEM	1393	0.915
CHAGOK1_LUNG	1417	0.924
CJM_SKIN	1644	0.936
CL40_LARGE_INTESTINE	1230	0.808
COLO679_SKIN	1588	0.876
COLO792_SKIN	1817	0.935
COLO800_SKIN	1550	0.874
CORL279_LUNG	1241	0.808
CORL47_LUNG	848	0.715
DAOY_CENTRAL_NERVOUS_SYSTEM	1587	0.93
DETROIT562_UPPER_AERODIGESTIVE_TRACT	1370	0.771
DKMG_CENTRAL_NERVOUS_SYSTEM	1140	0.752
DU4475_BREAST	1319	0.698
EKVX_LUNG	1729	0.957
ESS1_ENDOMETRIUM	1821	0.939
F5_CENTRAL_NERVOUS_SYSTEM	1975	0.944
FADU_UPPER_AERODIGESTIVE_TRACT	1483	0.889
FU97_STOMACH	1537	0.898
G292CLONEA141B1_BONE	1490	0.897
GAMG_CENTRAL_NERVOUS_SYSTEM	1539	0.927
GB1_CENTRAL_NERVOUS_SYSTEM	1755	0.957
GCIY_STOMACH	1822	0.964
GI1_CENTRAL_NERVOUS_SYSTEM	1252	0.88
GSS_STOMACH	1261	0.863
H4_CENTRAL_NERVOUS_SYSTEM	1670	0.873
HARA_LUNG	1859	0.947
HCC1419_BREAST	1715	0.864
HCC1428_BREAST	1653	0.933
HCC15_LUNG	1277	0.798
HCC1937_BREAST	1481	0.926
HCC202_BREAST	1365	0.82
HEC1A_ENDOMETRIUM	823	0.537
HEC1B_ENDOMETRIUM	1371	0.889
HEC251_ENDOMETRIUM	1634	0.901
HEC50B_ENDOMETRIUM	1731	0.949
HEC6_ENDOMETRIUM	1338	0.865
HGC27_STOMACH	1534	0.853
HLF_LIVER	1341	0.895
HMC18_BREAST	1654	0.95
HS294T_SKIN	1594	0.904
HS683_CENTRAL_NERVOUS_SYSTEM	1440	0.901
HS695T_SKIN	2150	0.868
HS729_SOFT_TISSUE	1619	0.927
HS944T_SKIN	1619	0.938
HT1080_SOFT_TISSUE	1528	0.935
HT1197_URINARY_TRACT	1321	0.79
HT1376_URINARY_TRACT	1045	0.743
HT144_SKIN	1948	0.881
HUH1_LIVER	1472	0.935
HUH6_LIVER	1873	0.942
IGR1_SKIN	1704	0.957
IPC298_SKIN	1480	0.939
JHH1_LIVER	1758	0.942
JHH4_LIVER	1430	0.908
JHH7_LIVER	1591	0.952
JHOS2_OVARY	1294	0.902
JMSU1_URINARY_TRACT	2230	0.971
K029AX_SKIN	1065	0.738
KALS1_CENTRAL_NERVOUS_SYSTEM	1520	0.929
KLE_ENDOMETRIUM	1482	0.842
KMBC2_URINARY_TRACT	1460	0.908
KMRC20_KIDNEY	1584	0.936
KNS42_CENTRAL_NERVOUS_SYSTEM	1451	0.856
KNS60_CENTRAL_NERVOUS_SYSTEM	1351	0.878
KNS62_LUNG	1625	0.952
KNS81_CENTRAL_NERVOUS_SYSTEM	1218	0.709
KS1_CENTRAL_NERVOUS_SYSTEM	496	0.356
KU1919_URINARY_TRACT	1810	0.943
KYSE180_OESOPHAGUS	1790	0.964
KYSE270_OESOPHAGUS	1587	0.855
KYSE30_OESOPHAGUS	1665	0.937
KYSE410_OESOPHAGUS	1550	0.928
KYSE450_OESOPHAGUS	1580	0.952
LI7_LIVER	1518	0.919
LN18_CENTRAL_NERVOUS_SYSTEM	1618	0.929
LN235_CENTRAL_NERVOUS_SYSTEM	1417	0.9
LN382_CENTRAL_NERVOUS_SYSTEM	1501	0.933
LN443_CENTRAL_NERVOUS_SYSTEM	1547	0.912
LNZ308_CENTRAL_NERVOUS_SYSTEM	1501	0.937
M059K_CENTRAL_NERVOUS_SYSTEM	1489	0.916
MALME3M_SKIN	1191	0.798
MCAS_OVARY	1480	0.921
MDAMB435S_SKIN	1685	0.952
MELHO_SKIN	1384	0.801
MFE319_ENDOMETRIUM	1414	0.87
MKN45_STOMACH	1730	0.867
NCIH1299_LUNG	1576	0.949
NCIH1650_LUNG	1690	0.899
NCIH1703_LUNG	1919	0.967
NCIH2110_LUNG	1285	0.813
NCIH2172_LUNG	1664	0.955
NCIH838_LUNG	1627	0.944
NCIN87_STOMACH	1366	0.723
NUGC3_STOMACH	1740	0.966
OAW28_OVARY	1766	0.942
OE21_OESOPHAGUS	1824	0.937
ONS76_CENTRAL_NERVOUS_SYSTEM	1609	0.887
OSRC2_KIDNEY	1420	0.911
OV90_OVARY	1646	0.941
OVMANA_OVARY	1358	0.776
PANC1005_PANCREAS	1504	0.909
PATU8988S_PANCREAS	1473	0.94
PF382_HAEMATOPOIETIC_AND_LYMPHOID_TISSUE	1372	0.91
PK1_PANCREAS	1611	0.939
PLCPRF5_LIVER	1593	0.926
RCC10RGB_KIDNEY	1115	0.726
RD_SOFT_TISSUE	1699	0.954
RERFLCAI_LUNG	1435	0.927
RH30_SOFT_TISSUE	1861	0.893
RKN_SOFT_TISSUE	1427	0.914
RPMI7951_SKIN	1406	0.923
RT11284_URINARY_TRACT	1591	0.884
RT4_URINARY_TRACT	742	0.456
RVH421_SKIN	1467	0.85
SCABER_URINARY_TRACT	1812	0.913
SF295_CENTRAL_NERVOUS_SYSTEM	1695	0.959
SF767_CENTRAL_NERVOUS_SYSTEM	1693	0.949
SH10TC_STOMACH	1376	0.844
SJSA1_BONE	1324	0.912
SKBR3_BREAST	1595	0.891
SKHEP1_LIVER	1448	0.848
SKMEL24_SKIN	1375	0.886
SKMEL30_SKIN	800	0.72
SKMES1_LUNG	1483	0.929
SLR20_KIDNEY	1514	0.94
SLR23_KIDNEY	1703	0.944
SLR26_KIDNEY	1368	0.886
SNGM_ENDOMETRIUM	1528	0.922
SNU1_STOMACH	1679	0.951
SNU398_LIVER	1634	0.921
SNU449_LIVER	1456	0.903
SNU685_ENDOMETRIUM	1670	0.926
SUIT2_PANCREAS	1490	0.89
SUPT1_HAEMATOPOIETIC_AND_LYMPHOID_TISSUE	1468	0.888
SW48_LARGE_INTESTINE	1549	0.846
T24_URINARY_TRACT	1477	0.876
T3M4_PANCREAS	1147	0.83
T98G_CENTRAL_NERVOUS_SYSTEM	1616	0.903
TCCSUP_URINARY_TRACT	1685	0.942
TE1_OESOPHAGUS	1388	0.922
TEN_ENDOMETRIUM	1734	0.923
TUHR10TKB_KIDNEY	547	0.568
TUHR4TKB_KIDNEY	1182	0.848
U118MG_CENTRAL_NERVOUS_SYSTEM	1453	0.895
U2OS_BONE	1769	0.927
U343_CENTRAL_NERVOUS_SYSTEM	1735	0.924
U87MG_CENTRAL_NERVOUS_SYSTEM	1162	0.784
UACC62_SKIN	1585	0.921
UMUC3_URINARY_TRACT	1526	0.928
UOK101_KIDNEY	1468	0.845
VMCUB1_URINARY_TRACT	1624	0.93
WM115_SKIN	1011	0.686
WM1799_SKIN	1606	0.899
WM2664_SKIN	1663	0.931
WM983B_SKIN	1519	0.912
YKG1_CENTRAL_NERVOUS_SYSTEM	1596	0.938
