# Supplementary material for: A network of human functional gene interactions from knockout fitness screens in cancer cells
Source: Life Sci Alliance. 2019 Apr 12;2(2):e201800278. doi: 10.26508/lsa.201800278 (PMC6464042; doi:10.26508/lsa.201800278)
Supplement: Supplementary file 6 [file LSA-2018-00278_TableS6.xlsx]

## Sheet: Sheet1
Cluster ID	Members
1	ARPC4	LCE1A	ZNF85	LCE1B	PRAMEF17	OR5H1	ANAPC10	LSM5	ABCE1	C7orf26	INTS14	SRP54	REV1	ORC4	TICAM2	ZBTB4	SMR3B	PSMA4	PSMA1	U2AF1	EIF3CL	USP39	LSM6	KCNC3	RTFDC1	ATP6V1C1	POLR1B	KRTAP5-3	KRTAP5-10	GINS4	COPS3	MED4	CTAGE15	ANAPC1	PES1	TAF1A	INTS13	NUF2	SMC6	POLR3F	SUPT16H	SKP1	ORC3	CHGA	OR5K2	TTK	RPF2	MCM6	TAF2
2	NDUFA8	NDUFS5	NDUFV2	EARS2	MRPS6	MRPS24	MRPL43	LARS2	NDUFS1	TWNK	NDUFC1	NDUFB3	FARS2	NDUFA11	MARS2	MRPS11	NDUFB8	NDUFB10	KIAA0391	UQCRB	UQCRC2	NDUFS2	NDUFS8	MRPS14	GTPBP10	MRM3	NDUFA6	MRPL21	HARS2	MRPS12	MRPL15	MRPL23	NDUFA10	MRPL18	NDUFA2	NDUFB6	MRPL39	MRPS25	FOXRED1	NDUFAF1	MRPL47	VARS2	MTG2	MRPL46	GFM1	TFB1M	MRPL57	MRPS18C	DLD
3	RNASEH2A	RNASEH2C	DPH1	DPH2	ELP3	ELP6	METTL1	WDR4	CTU2	URM1	DPH5	ADAT2	TRMT61A	RNASEH2B	RTCB	C1orf109	SPATA5L1	MRE11	ELP5	ELP2	ORC5	ELP1	NR2C2AP	ADAT3	TRMT6	KTI12	PTPMT1	TAMM41	MECR	RAD50	PKM	TPI1	CDIPT	DCPS	PGS1	CTU1	RPP21	WDR18	DNLZ	DOLK	DPH6	FDXR	TIMM10	GTF3C4	DNAJC2	HSPA14	DOHH	HSCB	DPH3
4	AIDA	LURAP1L	KRT18	CWC27	ETFB	CHEK1	OR10Z1	ASB4	TMED8	TPP2	OR1J1	TBC1D3C	EIF4A3	SMU1	DEK	STRN	RAD52	OR2M3	ZNF382	ZNF680	OR7D4	NBEAL1	TBC1D3H	SYT1	ZFP90	OR8D1	TRIM49B	PLEKHG3	HAMP	FAM25A	OR7E24	DLG1	INTS2	POTEG	POLE	RNF14	TRPV3	USP5	LRRC28	ANAPC4	OR6F1	MKNK1	NUCB1	GJA3	EFTUD2	GTF3C2	ETF1	RPS2	ANKRD18A
5	GNPDA2	OCLM	SULT1E1	ZNF99	RNF19A	FAM200B	ABHD13	TAS2R10	TATDN1	RETREG1	OR5AS1	ZNF676	ASNSD1	MS4A5	ASCC3	NAA35	SPHAR	IL12RB2	SLFN13	TPRKB	SKA1	KCNE2	ALG9	UBA6	TATDN3	DENND2C	ZNF728	CPNE3	CCNT2	SULT6B1	FCF1	UGT2B11	LRRC1	BNIP3	AP4S1	CEP55	RAP1B	KIAA1551	ATP6V1D	ZRANB2	ATAD5	PPHLN1	SLC38A11	NT5C3A	SUGP2	CCDC58	ZNF383	RNF146	PRH2
6	ATIC	PAICS	CAD	UMPS	GART	PFAS	AP2M1	AP2S1	PPAT	DHODH	ADSL	SDHA	SDHB	MTHFD1	GMPS	FPGS	DLST	OGDH	ADSS	DHFR	TYMS	PPCDC	RPIA	TKT	PGD	SDHC	RPE	TFRC	YRDC	IMPDH2	CTPS1	GFPT1	PGM3	ALAD	NAMPT	IPPK	ITPK1	AHCY	MVD	PMVK	GCLC	ALAS1	SDHD	COASY	DTYMK	UGP2	RFK	FH	UROS
7	COL14A1	DCAF4L2	SLC26A7	ZFHX4	MTSS1	SLC30A8	SNTB1	TFAP2C	KLHL38	C8orf76	RIPK2	TRPA1	ATAD2	NOV	HAS2	FAM83A	DEPTOR	TRMT12	PLEC	HNF4G	C8orf88	ANXA13	AARD	PPP1R1B	TBC1D31	ZHX2	NEUROD2	ENPP2	PPP1R16A	CDK5	FER1L6	HSF1	CACNB1	DLX3	IKZF3	FBXL20	KRTAP4-11	GSDMB	DERL1	FBXL6	WIPF2	RDH10	ZPBP2
8	ACTR3	ITGAV	ITGB5	ILK	LIMS1	FERMT2	PTK2	TLN1	RAC1	RSU1	ELMO2	CRKL	VCL	PKN2	WWTR1	BCAR1	PHACTR4	RAPGEF1	CRK	TRIO	RAPH1	DOCK5	TEAD1	PXN	PARVA	CDC42	DLG5	DOCK7	FGFR1OP2	RHOG	CDH2	ITGB3	BCAR3	TULP4	ZEB1	SRC	PRKAR1A	SMPD4	PDGFRB
9	TADA1	TAF5L	TADA2B	SUPT20H	TAF6L	MED23	MED24	SUPT7L	BRD9	SMARCD1	MED16	BICRA	MED1	MED9	TADA3	MED25	MED15	MED19	MED13	MED10	KAT2A	MED13L	CCNC	EP300	ZMYND8	SMARCA4	MYBL2
10	TEDC1	TUBD1	TUBE1	RTTN	KNTC1	ZWILCH	TEDC2	SASS6	STIL	CENPJ	PLK4	CCP110	CEP97	CEP120	CEP152	CEP135	SPICE1	WRAP73	ZW10	PCNT	URB1	UBE3D	PHF23	NIP7
11	CNIH4	ARGFX	VN1R2	ABCG1	MOG	RPS13	KIF11	EIF3G	NEDD1	RPL11	PRMT5	NBPF11	CACTIN	ANKRD36	CFD	PC	HIST1H2BC	SNRNP200	RPL37	EIF2B4	HIST1H2BE	SRSF2
12	MDM2	PPM1D	MDM4	USP7	DCLRE1B	PPP2R2A	PPM1G	UBE2D3	XRCC4	TERF1	RPL6	ADRM1	CENPF	PSME3	WDR89	HIST2H3D	RBM17	TERF2	PPP2R1A	ACD	SERBP1
13	SLC9B1	DPPA3	DUXA	SOCS5	MTRNR2L1	AQP7	KRT79	PKP2	CDV3	RAP1A	GRK7	LRRC15	SLC22A17	ADAM11	TSTA3	PAN2	METTL15	CACNB3	ERICH5	CAMKK2
14	BRAF	MAPK1	MITF	SOX10	DUSP4	PEA15	NFATC2	SOX9	ZEB2	LIF	ELOA	MAP2K1	TFAP2A	GTF2H5	USP38	DUSP10	TXNL1	ANKRD54	MAML2
15	MANSC4	TDG	LMNTD1	ITPR2	ERGIC2	CASC1	FAR2	LRMP	C12orf71	TM7SF3	RASSF8	BCAT1	ETFBKMT	SSPN	ARNTL2	BHLHE41	KLHL42	TMTC1	BICD1
16	VPS18	VPS33A	LAMTOR1	LAMTOR3	VPS39	LAMTOR2	LAMTOR4	RRAGC	VPS41	VPS29	VPS35	VPS16	RRAGA	FLCN	VPS26A	AP3B1	SNAPIN	ARL8B
17	CBFB	RUNX1	MYB	GFI1	SLC5A3	TMX2	BCL2	WSB1	ATP1B3	RUNX2	FAR1	SPI1	TMEM161B	ZFP36L2	STMN1	FLI1
18	SDC3	C2orf68	ZFC3H1	EID2	TBC1D10B	FBXW4	BAD	HOXC5	RITA1	ELMOD3	WHAMM	FRAT2	RTN2	RHOF	PCMT1	L3MBTL1
19	FANCI	UBE2T	FANCL	FANCG	FANCD2	FANCF	FANCC	FANCA	FANCM	RFWD3	BRIP1	ERCC4	ETAA1	ERCC1	SLX4
20	RGP1	RIC1	RAB6A	VPS52	VPS53	VPS54	EIPR1	JTB	SYS1	VPS51	ARFRP1	HTT	RAB14
21	HUS1	RAD9A	RAD1	CIP2A	RHNO1	H2AFX	MDC1	NBN	RNF168	RAD17	GTF2A2	MCPH1	TOPBP1
22	COG5	COG7	COG3	COG4	COG6	UNC50	GET4	COG1	PTAR1	COG2	COG8	SLC10A7	YKT6
23	CYP2A13	ZFAND5	ATP1A3	DMRTC2	PRX	GSK3A	RABAC1	NCCRP1	ETHE1	CATSPERG	RAB4B	LIPE	C19orf47
24	MBTPS1	SCAP	SCD	SREBF1	CYB5B	TMEM41A	AMFR	C12orf49	PCYT1A	MYLIP	DHRS7B	ACSL3
25	EXT1	EXT2	EXTL3	SLC35B2	B3GALT6	HS2ST1	FGFR1	B3GAT3	FRS2	NDST1	TMEM165	XYLT2
26	PEX6	PEX13	PEX26	PEX19	PEX5	ACOX1	PEX2	HSD17B4	PEX12	PEX1	PEX10	PEX14
27	FKBP9	SUMF2	PSPH	PHKG1	2018-09-14	VSTM2A	LANCL2	SLC29A4	RNASET2	VOPP1	AVL9	INMT
28	SPDYE1	RPL36AL	RASA4	UPK3BL1	TRIP6	S100A11	PTMA	RABGEF1	SUMO2	POM121C	ARHGEF5	DTX2
29	CASS4	GNAS	MAP1LC3A	RBM38	PMEPA1	THEM6	SPAG4	VAPB	PCMTD2	RAB22A	RGS19	SCAND1
30	CIART	HYDIN	SV2A	ZNF687	FMO1	RNF115	ECM1	HIST2H2AB	RFX5	DCST1	MINDY1	HFE2
31	ARPC3	ARPC2	BRK1	NCKAP1	ACTR2	WASF2	ABI1	HSBP1	TNS3	MYO10	CYTH3
32	CLPB	HTRA2	MTCH2	MTX2	DNAJC11	TIMM13	YME1L1	HAX1	TMEM11	CHCHD3	TIMM17A
33	IRF4	PTPN2	IKZF1	SBNO2	STAT3	PTPN1	SH3GL1	SP110	CITED2	SEC14L1	CCNT1
34	PGAP2	PIGV	PIGM	PIGW	GPAA1	PIGT	PIGS	PIGP	PIGO	PIGU	PIGH
35	FAM69A	PTGER3	PTCH2	ANKRD13C	AGO1	WDTC1	CCDC30	PRKAR2A	NR0B2	ADPRHL2	IQCC
36	CNPY4	NSUN5	GJC3	PMS2	GATS	PVRIG	MAP2K2	GNL1	ZKSCAN5	UFSP1	ZSCAN21
37	UBA5	UFM1	UFL1	UFSP2	ODR4	UFC1	DDRGK1	DNAJC21	CDK5RAP3	ABCF1
38	PARD6B	PRKCI	PARD3	TP53BP2	ARHGAP29	MECOM	PAX8	CRB3	HNF1B	SOX17
39	HGS	UBAP1	USP8	PTPN23	ATP6V1H	TFG	VPS37A	CLTC	VPS36	PSMD6
40	EIF4B	TDGF1	SSBP3	DDX6	YBX1	SLC4A5	RPL41	SPACA7	FAM183A	STXBP1
41	OR1E2	RAB26	ZNF692	CR1L	HAPLN2	OR2C3	BPIFB3	UPF3A	PSG8	ETV3
42	OR4N4	OR4Q3	OR4N2	RNF145	OR4M2	OR4N5	CXADR	MRPS36	OR4K1
43	ISL1	MYCN	IGF2BP1	HAND2	PHOX2B	SOX11	HDAC2	LIN28B	MSI2
44	TRAPPC2L	TRAPPC13	RAB1A	SCFD1	SEC23IP	TRAPPC4	CNIH1	TRAPPC1	WDR25
45	SLC16A5	TEX29	BAK1	ZER1	IRF6	METTL7A	EVA1C	B3GNT4	TMEM184A
46	PSME2	PPIA	WBP1	NOTCH2NL	TASP1	GOLGA6L1	TMEM69	RNF138	NTAN1
47	RANBP2	TTC1	GLE1	PHAX	ICE1	CCDC174	POLR2H	DDX46	SMG5
48	H2AFZ	NUDT4	HIST1H2BJ	LIX1L	UBE2Q2L	CLK2	PDZK1	AQP10	GJA5
49	UBE2H	YPEL5	WDR26	MAEA	RANBP9	RMND5A	MEMO1	FAM122A
50	POLE3	POLE4	CHTF18	DSCC1	EXO1	FEN1	RFC3	POLE2
51	MAPKAP1	RICTOR	MLST8	AKT1	GNB2	PIK3CB	PDPK1	MTOR
52	ERBB2	ERBB3	GRB7	MIEN1	PIK3CA	TCAP	PGAP3	PNMT
53	SSR1	SSR2	OST4	STT3A	HSP90B1	OSTC	DDOST	RPN2
54	WASHC4	RAB21	WASHC5	WASHC3	COMMD2	COMMD8	RAB7A	COMMD6
55	FOXA1	SPDEF	ESR1	TRPS1	ZNF652	GATA3	ZGPAT	FGFR4
56	ACTR5	INO80C	NFRKB	UCHL5	INO80B	TFPT	INO80	ACTR8
57	CYHR1	TMEM64	GGT7	FAM83C	MYH7B	EDEM2	ZNF512B	C9orf16
58	C8orf33	PGBD2	CHAMP1	SLC27A5	TUBB8	ZBTB45	PDIA4	TSNARE1
59	ATP5MC1	MFSD11	GALK1	MBTD1	NT5C	GPR142	HID1	PLEKHM1
60	FAM76B	PLEKHB1	P2RY6	IL18BP	RNF169	CNTN5	P4HA3	TM7SF2
61	STX4	STXBP3	RAB10	RABIF	GRHL2	SNAP23	MRGPRD
62	EMC2	EMC6	EMC1	EMC3	EMC4	EMC7	NCLN
63	RAD51D	XRCC2	XRCC3	RAD51C	RAD51B	RAD51	SFR1
64	TAF3	TAF5	TAF10	TAF4	BRD2	TAF12	TAF8
65	NANOG	FAM133B	FABP5	CTAGE1	HMGN1	VENTX	ASPSCR1
66	ATP5MD	STEAP2	SELENOW	FIP1L1	MZT1	LYRM2	EXOSC3
67	EEF1B2	IFITM3	PEF1	UBQLN4	FTH1	CEP131	PLG
68	MKRN1	OLFML3	KLF7	GGCT	HNRNPR	NENF	ZNF658
69	THOC1	HAUS1	NUP153	SNRNP27	SART1	HES1	ZNF407
70	ATP2B4	TSACC	FAM189B	NPL	PAQR6	DCAF6	TRIM46
71	DEXI	ELL3	GOLGA8M	TYRO3	GOLGA6L10	SERINC4	HERC2
72	RPE65	PDZK1IP1	RAD54L	TIE1	TMEM53	HYI	MYCBP
73	CCL26	GPC2	ZNF789	SLC26A5	ZNF655	ARMC10	ISG20L2
74	CNEP1R1	CTDNEP1	LMNB1	TMPO	LEMD3	LMNA
75	CTNNB1	TCF7L2	FERMT1	UBE2Z	TTC7A	BCL9L
76	SUCO	TAPT1	SLC33A1	NFE2L2	ADPGK	DNAJB11
77	GNA13	RIC8A	RHOA	AFDN	PDCL	LPAR2
78	BRPF1	KAT6A	ASH1L	KMT2A	MEN1	DOT1L
79	TP53	TP53BP1	POLR3B	C20orf196	RPL22	ZNF318
80	C10orf76	PI4KB	SPTLC2	SPTSSA	COL4A3BP	TM9SF2
81	TMEM199	ATP6V0B	ATP6V0C	WDR7	ATP6V1F	ATP6V1A
82	SLC35G3	ALDH3A1	FOXO3	SHMT1	MYO15A	CCDC144NL
83	HIST1H2AB	HIST2H2AC	HIST1H2AH	PAQR3	HIST1H2AE	HIST2H2BF
84	ARMC7	RBM48	BUD13	BCCIP	TAF1D	OSBP
85	RRS1	POLR1E	PWP1	ZNRD1	TCOF1	RPF1
86	HOXC10	ARL4D	NTF3	DDX27	SAP30BP	KCNC4
87	TBCC	AKIRIN2	RBM42	SRP19	PSMB1	SPCS3
88	LRRC32	TRIM48	TRIM64B	KCTD21	GAB2	USP35
89	OTOP1	PPIAL4D	GOLPH3L	GABPB2	ABHD17A	ZC3H11A
90	AK6	C1D	FBL	PAK1IP1	NOP9	DIS3
91	SPRR2G	LRRC37A3	KRTAP4-2	KRT16	KRTAP4-8	KRT33A
92	TSC1	TSC2	DDIT4	KEAP1	BDH2
93	EEFSEC	SEPSECS	PSTK	GPX4	SEPHS2
94	PAGR1	PAXIP1	MAU2	NIPBL	PRR12
95	KCMF1	UBR4	BIRC6	HECTD1	PPP1R15B
96	ALG6	ALG8	ALG5	DOLPP1	FNDC3B
97	STN1	TEN1	CTC1	POT1	TINF2
98	RAB3GAP1	RAB3GAP2	RAB18	TBC1D20	FITM2
99	RAF1	SHOC2	NRAS	PRKCE	GOLGA7
100	ATG9A	RB1CC1	ATG101	ATG13	EPG5
101	CKS1B	SKP2	CCNE1	CDK2	E2F3
102	IGF1R	IRS2	CNPY2	KBTBD2	IRS1
103	BIRC2	TRAF2	MAP3K7	RNF31	RELA
104	DPM2	DPM3	DPM1	ALG3	ALG12
105	PSMB5	THAP1	BUB3	PSMB6	COPS6
106	SMARCB1	SMARCC1	SMARCE1	ARID1A	DPF2
107	FAM231AP	MST1	GGT1	NPIPB6	PKD1
108	ARHGEF7	PAK2	MARK2	EFR3A	YAP1
109	E2F6	GGTLC2	AIFM3	RIMBP3	OR4F21
110	SKA3	SGO2	SPAG5	ZNF283	CDC16
111	PDCD6	CPNE7	XXYLT1	TCTEX1D2	CDH12
112	WDR61	ELOF1	SUPT4H1	LEO1	DDX59
113	DHX35	WDR83	GPATCH1	LENG1	CCDC130
114	DIRAS3	KCND3	PSRC1	TEKT2	UBL4B
115	PIK3R4	UVRAG	BECN1	PIK3C3	SNF8
116	IMPA1	C8orf82	YWHAZ	MYT1	FAM91A1
117	MOK	LIPM	DNAJC30	CPNE6	MCEE
118	CDC7	DBF4	CDK8	FBXO5	TICRR
119	NOM1	NAF1	RIOK1	WDR74	NOLC1
120	TTI2	SPATA5	CCNH	WDR46	U2SURP
121	SUPT3H	ICE2	USPL1	ELL	EAF1
122	IFITM2	ATP5MC2	PRR13	CCDC114	RALA
123	GBF1	CENPC	NUP155	TTF1	RTF1
124	ZNF169	CXCL14	SPATA31A6	TFDP1	ASS1
125	NFYB	NUP107	NUP133	SFSWAP	SMNDC1
126	GZMH	OR4A47	OR4D9	CD5	OR4C46
127	DRICH1	CRYBB3	MPPE1	TBC1D10A	GAB4
128	SYPL2	AKR7A3	GSTM2	HAO2	MYBPHL
129	GTF2A1	PAXBP1	PRPF18	BRF1	TBP
130	CCDC78	TUBB2A	MXRA7	MICB	KRTAP10-9
131	ACOT4	YIF1B	PRR22	RTEL1	CADM4
132	RADIL	URGCP	ZNF771	FRG2C	CYS1
133	STX1B	VPS37C	CEP68	SDHAF2	YJEFN3
134	ASL	BHLHA15	ZKSCAN1	ZSCAN25	LRCH4
135	CCDC36	TESMIN	GSTP1	BBS1	MYEOV
136	GRB2	PTPN11	SOS1	GAB1
137	DET1	COP1	STK40	TRIB1
138	PSMG1	PSMG2	PSMG4	PSMG3
139	MIOS	WDR24	WDR59	SEH1L
140	IER3IP1	TMEM167A	YIPF5	SCYL1
141	CNOT10	CNOT11	CNOT1	GGNBP2
142	ACACA	FASN	ACLY	CHP1
143	CHTF8	WDHD1	RNF8	TRAIP
144	POP7	RPP25L	ALG2	FXN
145	ASNS	EIF2AK4	ATF4	GLUL
146	ELOB	VHL	EGLN1	CUL2
147	FAM129B	IQGAP1	CAP1	KLF5
148	DERL2	SYVN1	UBE2G2	FAF2
149	TGFBRAP1	VPS8	RAB5C	VPS45
150	NSMCE2	NSMCE1	SMC5	NSMCE4A
151	MTMR6	MTMR9	DNAJC13	WDR91
152	WDYHV1	ZHX1	NCALD	SLC16A3
153	LCMT1	CYB5R4	TIPRL	PTPA
154	TIMM29	TIMM22	SLC25A28	SLC25A37
155	NELFA	NELFB	HIST1H1C	NELFE
156	JUN	MAP2K7	GABARAP	ZFP36L1
157	RPP38	DIMT1	PRDM10	PNO1
158	CBWD5	LYPLA1	MT1E	ZNF551
159	ITGA3	ITGB1	CD151	SNX17
160	KAT14	YEATS2	TADA2A	ZZZ3
161	CDC25B	FOXM1	CCNB1	BORA
162	IMP4	EXOSC2	RCL1	RRP12
163	AK4	OTX1	TSPAN11	RBM23
164	EIF3F	EIF3E	EIF3M	EIF3H
165	FAM229A	GPX8	MIEF2	INHBE
166	CDC6	PAF1	BCAS2	CENPH
167	PDHX	PAMR1	SCFD2	EHF
168	DPAGT1	FARSB	RFT1	RPL12
169	POTEH	OR4K13	H3F3C	SGPP1
170	ZNHIT1	VPS72	SRCAP	CFDP1
171	MED17	MED30	MED28	PRPF3
172	BET1	EXOC4	DNMT1	BUB1
173	NRBF2	EPS8L3	DEPDC1	AMPD1
174	ZNF253	KCTD9	SEC24A	AP3M2
175	NIPAL2	HGH1	FAM135B	LY6K
176	HAUS3	KANSL1	HAUS6	STX12
177	CAPRIN1	EDF1	G3BP1	IRF2
178	KIF21B	ADAMTSL4	C1orf54	SELENBP1
179	AP1B1	AP1G1	RAB11A	AP1S1
180	TWISTNB	TRIM61	C17orf58	CAST
181	HSPA5	MED6	POLR2I	ABT1
182	SPTLC1	ENGASE	STAT5A	NGFR
183	AMZ1	CPAMD8	IGF2BP3	NPC1L1
184	FBLIM1	KCNA10	DMRTA2	ARID3B
185	SCPEP1	TMEM235	LGALS3BP	DGKE
186	PDE4DIP	TMA7	IGSF3	RTN3
187	MGAT1	STT3B	SLC39A9	MGAT2
188	FAM84B	HOXC13	TMEM245	THAP3
189	PALM	SMARCD2	TBX4	GJC1
190	INTS5	INTS7	HIST1H1D	INTS12
191	KPNA2	NUP37	NUP188	NUP43
192	ALX4	FGF4	ANO1	FGF19
193	NCAPD3	NCAPG2	NCAPH2
194	ASNA1	WRB	CAMLG
195	CCDC6	FBXO42	NUP62
196	EED	EZH2	SUZ12
197	DDI2	NGLY1	NFE2L1
198	CENPO	CENPP	CENPU
199	ARID2	PBRM1	BRD7
200	BRAT1	WDR73	INTS9
201	FGFR1OP	PPP2R3C	CEP350
202	PFDN1	PFDN5	PFDN4
203	C21orf2	NEK1	KIF2A
204	TM2D2	TM2D3	TM2D1
205	DR1	DRAP1	BTAF1
206	B3GNT5	UGCG	B3GNT2
207	GTSE1	TACC3	DLGAP5
208	NCSTN	PSENEN	PSEN1
209	BLM	RMI1	RMI2
210	FKBP1A	MIB1	BAMBI
211	FEM1A	EXOC3L1	HCRTR1
212	POP5	NEPRO	EXOSC6
213	MPC2	PDHB	CS
214	MIS18A	HIST1H2AC	SAE1
215	CTNNA1	CTNND1	CDH1
216	NDC1	NUP35	AAAS
217	SRBD1	TDP2	PIAS4
218	CNTNAP3	SPATA31A7	CNTNAP3B
219	USP17L5	FAM86B2	DEFB108B
220	CFAP20	CLASRP	CCAR1
221	NSRP1	IPO11	VMP1
222	IL1R1	MYD88	TRAF6
223	NBAS	USE1	NAPG
224	CPD	FURIN	MET
225	FDFT1	SQLE	FDPS
226	KIF2C	KIF18B	KIF15
227	PICALM	FAM49B	IRF2BP2
228	C19orf25	STX18	KDSR
229	RAB4A	HIST1H2AG	TBX3
230	RPP40	RPP30	RACK1
231	FOSL1	JUNB	TIPARP
232	DICER1	XPO5	DROSHA
233	POP4	RPP14	POP1
234	FOXK1	UBALD1	UBALD2
235	AVEN	DIS3L	SKIV2L
236	KANSL2	KANSL3	KDM2A
237	NCOA4	TAX1BP1	IREB2
238	RNF139	ZNF34	SLC52A2
239	BRD1	KAT7	MEAF6
240	OR10C1	FOXN4	H1FNT
241	KLB	TRIM71	NR5A2
242	NCOA5	ZNF638	CFLAR
243	PSMD1	PSMD3	PSMD12
244	ZNF431	ZNF492	ZNF138
245	SOD2	CLPP	CLPX
246	CDAN1	DNAJC9	ROCK2
247	YPEL1	YPEL3	SBK1
248	CDS2	CHMP4B	HNRNPH1
249	BCDIN3D	TPH2	TRIM45
250	EGFR	SHC1	FBXO11
251	KRTAP5-7	CA5A	DDX39A
252	RPA2	RIOK2	PFDN2
253	PPARG	RXRA	RARG
254	LCN6	RHPN1	ZCWPW2
255	LEP	CYP3A5	UBN2
256	CHMP7	VRK1	LEMD2
257	CYP2W1	HOXA11	CAV2
258	DPY19L2	IFT22	PCOLCE
259	RNF20	WAC	RNF40
260	AIMP2	ADCYAP1R1	ZNRF2
261	RPL3	RPLP1	RPLP2
262	ANTXRL	NUTM2A	SLAMF9
263	TFIP11	CENPT	CENPW
264	PARP10	LCN8	LYPD2
265	MON2	TM9SF3	SURF4
266	CNOT4	SRRD	UBAP2L
267	PPP1R27	TBX2	TOM1L1
268	PRPF40A	SF3B1	SON
269	MAD2L2	REV3L	UBE2N
270	PPP1R7	PPP1CC	SUGT1
271	BSND	TSSK3	C1orf127
272	SNAPC1	SNAPC2	SNAPC5
273	MSTO1	PDCD5	TXNDC9
274	CAPN9	RASSF5	CDH15
275	CERS2	ELOVL1	EXTL2
276	MAP3K2	TRAF7	KRAS
277	HDAC3	TBL1XR1	NCOR2
278	GTF2I	MYLK3	MCM3AP
279	GRASP	REEP2	RPL26L1
280	UBE2C	UBE2S	ANAPC15
281	NCL	CIR1	ZNHIT6
282	TSC22D2	WNK1	NRBP1
283	PCNP	DTX3	AGAP2
284	GATA6	HNF4A	HNF1A
285	BOD1L1	SETD1A	RHBDL1
286	SMC4	NCAPG	NUP88
287	PDCD2	NOB1	MCMBP
288	RIMKLA	FAHD2A	MZT2A
289	GPRIN2	SYNPO2L	SYT15
290	MTRNR2L3	CABLES2	GIP
291	CYLD	TNFAIP3	NFKBIA
292	CUL3	CAND1	COPS5
293	NPIPB5	KIAA2013	ABCC6
294	GTF3A	SRPRB	SRRT
295	NPAT	RBM39	HNRNPUL2
296	IK	NFYC	NFYA
297	TMSB10	RAB11FIP4	FKBP10
298	CD101	ZYG11B	GBP3
299	OR2T2	BPNT1	NAPRT
300	TSPOAP1	FSCN2	TMEM105
301	PAX3	TRMT61B	DFFB
302	TCP1	C16orf95	CCT4
303	GTF2F2	POLR3D	GPN3
304	DPPA5	HS6ST1	INPP4A
305	ARIH1	KCTD10	CCNA2
306	TLDC1	PTOV1	B4GALT3
307	YWHAE	YWHAG	YWHAB
308	PFKFB4	RPL23	RPS3
309	SLC2A6	SLC38A10	SEZ6
310	KIDINS220	XPR1
311	AHR	ARNT
312	PRPF39	TRNAU1AP
313	ATF7IP	SETDB1
314	FIG4	VAC14
315	TMED2	TMED10
316	CIT	KIF14
317	TMCO6	ZNF511
318	2018-03-05	MCL1
319	USP1	WDR48
320	BRCA2	PALB2
321	QRICH1	SEPHS1
322	CSDE1	STRAP
323	BARD1	BRCA1
324	GANAB	PRKCSH
325	EHMT1	EHMT2
326	TRAF3	NFKB2
327	CNOT2	CNOT3
328	ATMIN	DYNLL1
329	MAD2L1BP	TRIP13
330	EME1	MUS81
331	TXNDC17	TXNRD1
332	OR11H1	USP10
333	PLAA	USP14
334	RNF7	UBE2F
335	PPIL1	SNRNP40
336	MUC20	LCN15
337	GTF3C3	TRIR
338	SAP130	SIN3A
339	KMT2D	NCOA6
340	HEXIM1	LARP7
341	KRTAP5-9	KRTAP5-1
342	ARGLU1	SAP18
343	LURAP1	C1orf52
344	MORF4L1	PHF12
345	TRABD	WDR86
346	F11R	TJP1
347	C15orf41	TTF2
348	AGO2	ANKRD52
349	HMGA1	LYPLA2
350	PPP6C	PPP6R3
351	DPPA2	SHE
352	CMAS	SLC35A1
353	HBS1L	PELO
354	PMPCB	NUMA1
355	EFL1	SBDS
356	DCTN2	TBCE
357	SLC39A1	SOCS3
358	ZSCAN20	ATP6V1B2
359	ADAR	XRN1
360	NF2	KCTD5
361	C16orf72	VCPIP1
362	ADAMTS7	SIGLEC11
363	ATRN	MGRN1
364	RNPC3	CDC20
365	GHSR	SYT7
366	MTFP1	SPACA9
367	MYH9	MYL6
368	ATR	ATRIP
369	HECTD2	CDH26
370	P4HTM	TMEM80
371	CCND3	CDK6
372	EXOSC1	NOC4L
373	EPC2	ING3
374	ZNF622	DUSP12
375	SUCLA2	SUCLG1
376	PCK1	CNBD2
377	CDX2	SATB2
378	DAD1	PPP1R2
379	BRD8	MRGBP
380	C19orf53	ZNF593
381	OVOL2	PPP1R14B
382	MYCBPAP	TMEM104
383	EIF3K	EIF3L
384	CEBPZ	URB2
385	ZACN	PNPO
386	FKBP6	GIGYF1
387	EFHC1	NISCH
388	ARL2BP	CACYBP
389	MPHOSPH6	GOLGA8R
390	HAUS4	DHX9
391	METAP1	METAP2
392	CHMP1A	VPS4A
393	PNRC2	RHOC
394	EXOC2	EXOC8
395	RBM15	VIRMA
396	KRT28	BCLAF1
397	MZF1	RHBDF1
398	AXIN1	CTNNBIP1
399	NOL10	PDCD11
400	TUBA1B	TUBB
401	CHRND	FAM166A
402	CCDC84	PPIH
403	CCND1	CDK4
404	BPTF	SMARCA5
405	SHARPIN	WISP2
406	MORC2	MPHOSPH8
407	TBC1D5	SPG21
408	EXOSC10	NOL6
409	PPP1CB	PPP1R12A
410	CFL1	WDR1
411	FOLH1	P2RY2
412	FAM90A1	USP17L2
413	CPSF6	RSRC2
414	ZDHHC17	DXO
415	EXOSC8	NOC3L
416	CDC26	AATF
417	GAR1	IMP3
418	ANKRD11	SETD5
419	MEPE	ZBTB7B
420	PCF11	CWF19L2
421	C1orf100	LAMB3
422	MYC	MAX
423	CDK11A	TUBGCP6
424	VPS4B	VTA1
425	SNRPB2	TGS1
426	ZNHIT2	SUPT5H
427	GPR61	CPT2
428	FAM32A	FUBP1
429	RPAIN	PRPF38B
430	CASC3	SERPINB6
431	ASH2L	DPY30
432	MAIP1	OVCA2
433	HIST1H2BN	HIST2H2BE
434	GATAD2B	MBD3
435	CARD11	PDE1C
436	PPP1R10	TOX4
437	EIF2S2	SINHCAF
438	DMBT1	LPA
439	APC	CSNK1A1
440	YTHDC1	TXNL4A
441	SELENOI	PCYT2
442	COPA	COPE
443	B3GNT3	NKX6-3
444	CRTC3	CRTC2
445	CMIP	GNB1
446	CARD10	CHUK
447	SAMD12	EAF2
448	AURKA	TPX2
449	KATNA1	KATNB1
450	MAGOH	NOP2
451	ANKRD40	SPHK1
452	2018-03-06	UBE2J2
453	HEATR1	WDR75
454	GMNN	CUL1
455	ARSI	MXD3
456	UBE2O	IPO5
457	GATA5	PIGX
458	TP63	SNAI2
459	POLR2B	RPAP3
460	GLIPR1L1	HOXC11
461	AK2	LMO2
462	PON1	ABHD11
463	KCNJ4	HPS1
464	LCN10	ZDHHC19
465	H2AFV	PHC1
466	CHRAC1	BAZ1A
467	PDCD7	RPAP2
468	LDB1	ZMIZ1
469	PGPEP1	SYF2
470	FKBP8	KLHDC8A
471	UPF2	MED21
472	CALML6	KREMEN2
473	GAS2L2	TTBK1
474	PPME1	PPP2CA
475	KCNG1	PTRH1
476	GRWD1	TEX10
477	ESCO2	DDX11
478	C1QTNF4	HAPLN4
479	NOL7	POLR3K
480	FZD5	WLS
481	DSTYK	HSPA6
482	DCDC2B	PCSK9
483	FAM207A	PPP6R2
484	MPZL1	RGS2
485	HCFC1R1	TLCD1
486	PSMA3	PSMA7
487	ACTR1B	BIN1
488	KIAA1143	UCK1
489	SEC61B	SEC63
490	BTG1	CNOT6
491	GRK2	DHX29
492	OPRL1	SAMHD1
493	DYNC1LI1	DYNC1LI2
494	OR1D5	PRAMEF6
495	SUGP1	DDX39B
496	LGALS14	MSRB1
497	ECT2	KIF20A
498	SYT2	TRIM11
499	TPR	ZC3HC1
500	MFSD1	KIAA1328
501	HIRA	TLK2
502	ARF6	RAB35
503	CDT1	ORC6
504	HOXB9	NT5M
505	DNM1	TMEM240
506	ZFP57	ZNF696
507	SMG8	SMG9
508	PPP1R3E	TRIM9
509	MYOM3	SLC44A3
510	IQCF1	NFKBIE
511	C7orf25	GTPBP1
512	MEF2C	DMXL1
513	CCDC51	STARD7
514	FNDC11	RALY
515	DTD2	NEK2
516	AAMP	ZNF574
517	CDC37	HIST1H2BO
518	ATF6B	FOXRED2
519	HOXD11
520	CCDC86
521	AEBP1
522	RHOQ
523	OR2T27
524	MED31
525	CCDC59
526	CD1D
527	TWF1
[truncated: 482 more columns]
