# Supplementary material for: A network of human functional gene interactions from knockout fitness screens in cancer cells
Source: Life Sci Alliance. 2019 Apr 12;2(2):e201800278. doi: 10.26508/lsa.201800278 (PMC6464042; doi:10.26508/lsa.201800278)
Supplement: Supplementary file 7 [file LSA-2018-00278_TableS7.xlsx]

## Sheet: master-cluster-annotation-file-
ClusterID	NumGenes	NumCells	TissueSpec	AmpArtifact	CN_associated_genes	EXP_associated_genes	MUT_associated_genes	Corum	GOBP	GOCC	KEGG	NCI_Nature	Reactome
1	531	253				3		Spliceosome (human)(8.9);PA700-20S-PA28 complex (human)(8.9);26S proteasome (human)(8.6);RNA polymerase II holoenzyme complex (human)(8.3);BRCA1-RNA polymerase II complex (human)(7.9);	maturation of 5.8S rRNA (GO:0000460)(21.2);rRNA modification (GO:0000154)(20.2);maturation of 2S rRNA (GO:0000475)(19.7);chloroplast rRNA processing (GO:1901259)(19.7);maturation of 4.5S rRNA (GO:0000476)(19.7);		Spliceosome_Homo sapiens_hsa03040(16.8);Ribosome_Homo sapiens_hsa03010(10.9);RNA transport_Homo sapiens_hsa03013(8.2);Proteasome_Homo sapiens_hsa03050(11.4);		Mitotic Anaphase_Homo sapiens_R-HSA-68882(20.4);Mitotic Metaphase and Anaphase_Homo sapiens_R-HSA-2555396(20.3);Processing of Capped Intron-Containing Pre-mRNA_Homo sapiens_R-HSA-72203(18.8);Separation of Sister Chromatids_Homo sapiens_R-HSA-2467813(20.4);rRNA processing_Homo sapiens_R-HSA-72312(18.8);
2	306	72				906		55S ribosome, mitochondrial (human)(135.5);39S ribosomal subunit, mitochondrial (human)(82.0);28S ribosomal subunit, mitochondrial (human)(51.8);Respiratory chain complex I, mitochondrial (mouse)(37.4);Cytochrome bc1-complex (EC 1.10.2.2), mitochondrial (mouse)(10.7);	mitochondrial translation (GO:0032543)(54.7);tRNA aminoacylation for protein translation (GO:0006418)(47.0);mitochondrial respiratory chain complex I assembly (GO:0032981)(59.8);translational elongation (GO:0006414)(37.7);maintenance of translational fidelity (GO:1990145)(37.5);	mitochondrial large ribosomal subunit (GO:0005762)(87.6);mitochondrial respiratory chain complex I, peripheral segment (GO:0042652)(42.3);mitochondrial respiratory chain complex I, membrane segment (GO:0042653)(42.3);mitochondrial respiratory chain complex I (GO:0005747)(42.3);mitochondrial small ribosomal subunit (GO:0005763)(39.6);	Oxidative phosphorylation_Homo sapiens_hsa00190(51.0);Huntington's disease_Homo sapiens_hsa05016(38.3);Ribosome_Homo sapiens_hsa03010(44.0);Parkinson's disease_Homo sapiens_hsa05012(43.3);Non-alcoholic fatty liver disease (NAFLD)_Homo sapiens_hsa04932(42.0);		The citric acid (TCA) cycle and respiratory electron transport_Homo sapiens_R-HSA-1428517(79.3);Respiratory electron transport_Homo sapiens_R-HSA-611105(98.0);Respiratory electron transport, ATP synthesis by chemiosmotic coupling, and heat production by uncoupling proteins._Homo sapiens_R-HSA-163200(88.5);Complex I biogenesis_Homo sapiens_R-HSA-6799198(57.2);TP53 Regulates Metabolic Genes_Homo sa…
3	166	264	URINARY_TRACT(3.4);			78			tRNA threonylcarbamoyladenosine modification (GO:0002949)(20.8);tRNA methylation (GO:0030488)(18.7);tRNA thio-modification (GO:0034227)(19.5);mitochondrial tRNA modification (GO:0070900)(19.2);tRNA pseudouridine synthesis (GO:0031119)(18.4);				tRNA processing_Homo sapiens_R-HSA-72306(21.4);tRNA modification in the nucleus and cytosol_Homo sapiens_R-HSA-6782315(21.2);RNA Polymerase I, RNA Polymerase III, and Mitochondrial Transcription_Homo sapiens_R-HSA-504046(8.5);Gamma carboxylation, hypusine formation and arylsulfatase activation_Homo sapiens_R-HSA-163841(9.0);Mitochondrial protein import_Homo sapiens_R-HSA-1268020(7.8);
4	146	273						Spliceosome (human)(11.6);C complex spliceosome (human)(10.8);			Spliceosome_Homo sapiens_hsa03040(13.3);		Processing of Capped Intron-Containing Pre-mRNA_Homo sapiens_R-HSA-72203(10.9);mRNA Splicing - Major Pathway_Homo sapiens_R-HSA-72163(9.5);mRNA Splicing_Homo sapiens_R-HSA-72172(9.2);Influenza Life Cycle_Homo sapiens_R-HSA-168255(8.3);
5	110	3	LUNG(6.2);
6	89	80	HAEMATOPOIETIC_AND_LYMPHOID_TISSUE(6.5);BREAST(3.8);			870		Succinate dehydrogenase complex II (EC 1.3.5.1), mitochondrial (mouse)(9.4);	2'-(5''-triphosphoribosyl)-3'-dephospho-CoA biosynthetic process (GO:0019361)(23.9);XMP biosynthetic process (GO:0097293)(19.0);purine ribonucleoside monophosphate biosynthetic process (GO:0009168)(18.5);AMP biosynthetic process (GO:0006167)(18.1);ADP biosynthetic process (GO:0006172)(18.1);		Carbon metabolism_Homo sapiens_hsa01200(17.7);Amino sugar and nucleotide sugar metabolism_Homo sapiens_hsa00520(14.0);Citrate cycle (TCA cycle)_Homo sapiens_hsa00020(14.2);Purine metabolism_Homo sapiens_hsa00230(7.0);Biosynthesis of amino acids_Homo sapiens_hsa01230(8.9);		Metabolism of nucleotides_Homo sapiens_R-HSA-15869(21.3);Metabolism of vitamins and cofactors_Homo sapiens_R-HSA-196854(13.0);Metabolism of water-soluble vitamins and cofactors_Homo sapiens_R-HSA-196849(13.8);Purine ribonucleoside monophosphate biosynthesis_Homo sapiens_R-HSA-73817(19.0);Citric acid cycle (TCA cycle)_Homo sapiens_R-HSA-71403(16.4);
7	43	3		chr17q(3.5);chr8q(20.8);
8	39	22	CENTRAL_NERVOUS_SYSTEM(3.6);			43		Polycystin-1 multiprotein complex (ACTN1, CDH1, SRC, JUP, VCL, CTNNB1, PXN, BCAR1, PKD1, PTK2, TLN1) (human)(13.8);PXN-ITGB5-PTK2 complex (human)(8.2);CAS-SRC-FAK complex (human)(8.2);ITGAV-ITGB3-PXN-PTK2b complex (human)(7.6);	vascular endothelial growth factor receptor signaling pathway (GO:0048010)(15.0);vascular endothelial growth factor receptor-3 signaling pathway (GO:0036325)(16.2);vascular endothelial growth factor receptor-1 signaling pathway (GO:0036323)(16.2);vascular endothelial growth factor receptor signaling pathway involved in lymphatic endothelial cell fate commitment (GO:0060851)(16.2);vascular endothe…		Bacterial invasion of epithelial cells_Homo sapiens_hsa05100(19.7);Shigellosis_Homo sapiens_hsa05131(12.3);Chemokine signaling pathway_Homo sapiens_hsa04062(8.6);	Signaling events mediated by focal adhesion kinase_Homo sapiens_8fb80085-6195-11e5-8ac5-06603eb7f303(17.0);Nectin adhesion pathway_Homo sapiens_685baa82-6194-11e5-8ac5-06603eb7f303(17.8);Integrin-linked kinase signaling_Homo sapiens_21738158-6194-11e5-8ac5-06603eb7f303(15.9);Integrins in angiogenesis_Homo sapiens_2ddeac89-6194-11e5-8ac5-06603eb7f303(13.9);PDGFR-beta signaling pathway_Homo sapiens…	Cell-Cell communication_Homo sapiens_R-HSA-1500931(13.3);Cell junction organization_Homo sapiens_R-HSA-446728(9.5);Fcgamma receptor (FCGR) dependent phagocytosis_Homo sapiens_R-HSA-2029480(8.5);p130Cas linkage to MAPK signaling for integrins_Homo sapiens_R-HSA-372708(12.7);Cell-extracellular matrix interactions_Homo sapiens_R-HSA-446353(12.5);
9	27	15	HAEMATOPOIETIC_AND_LYMPHOID_TISSUE(5.0);			615		Mediator complex (human)(27.1);ARC-L complex (human)(16.9);ARC complex (human)(16.0);TFTC-type histone acetyl transferase complex (human)(14.8);ARC92-Mediator complex (human)(14.2);	transcriptional open complex formation at RNA polymerase II promoter (GO:0001113)(10.8);transcriptional start site selection at RNA polymerase II promoter (GO:0001174)(10.8);RNA polymerase II transcriptional preinitiation complex assembly (GO:0051123)(10.8);histone H3-K23 acetylation (GO:0043972)(10.8);histone H3-K18 acetylation (GO:0043971)(10.8);	STAGA complex (GO:0030914)(14.8);	Thyroid hormone signaling pathway_Homo sapiens_hsa04919(9.8);		Transcriptional regulation of white adipocyte differentiation_Homo sapiens_R-HSA-381340(24.4);PPARA activates gene expression_Homo sapiens_R-HSA-1989781(22.3);Regulation of lipid metabolism by Peroxisome proliferator-activated receptor alpha (PPARalpha)_Homo sapiens_R-HSA-400206(22.1);HATs acetylate histones_Homo sapiens_R-HSA-3214847(14.0);
10	24	63	AUTONOMIC_GANGLIA(3.9);			592			G2/M transition of mitotic cell cycle (GO:0000086)(8.1);positive regulation of centriole replication (GO:0046601)(12.1);positive regulation of non-motile cilium assembly (GO:1902857)(8.5);	centriole (GO:0005814)(17.7);			Anchoring of the basal body to the plasma membrane_Homo sapiens_R-HSA-5620912(10.8);Assembly of the primary cilium_Homo sapiens_R-HSA-5617833(8.8);Loss of proteins required for interphase microtubule organization from the centrosome_Homo sapiens_R-HSA-380284(9.8);Loss of Nlp from mitotic centrosomes_Homo sapiens_R-HSA-380259(9.8);AURKA Activation by TPX2_Homo sapiens_R-HSA-8854518(9.6);
11	22	276		chr6p(3.0);
12	21	93	SKIN(5.6);			630	TP53(10.4)
13	20	2
14	19	10	SKIN(12.4);			1946	BRAF(3.9)	Ksr1-Mek-Braf-Erk complex, EGF induced (mouse)(7.8);					RAF-independent MAPK1/3 activation_Homo sapiens_R-HSA-112409(10.8);Negative regulation of MAPK pathway_Homo sapiens_R-HSA-5675221(9.6);Negative feedback regulation of MAPK pathway_Homo sapiens_R-HSA-5674499(7.8);
15	19	4	PANCREAS(4.6);	chr12p(13.0);
16	18	32						Vps29-Vps35-Vps26a complex (mouse)(9.2);Class C VPS/HOPS complex (human)(7.9);	positive regulation of macroautophagy (GO:0016239)(15.4);regulation of lipophagy (GO:1904502)(15.2);regulation of aggrephagy (GO:1905335)(15.2);regulation of xenophagy (GO:1904415)(15.2);regulation of autophagosome maturation (GO:1901096)(15.0);	lysosomal glycocalyx (GO:0090123)(14.1);megasome (GO:0043246)(14.1);lysosome (GO:0005764)(14.1);primary lysosome (GO:0005766)(14.1);UDP-N-acetylglucosamine-lysosomal-enzyme N-acetylglucosaminephosphotransferase complex (GO:0070622)(14.1);			mTORC1-mediated signalling_Homo sapiens_R-HSA-166208(13.8);Energy dependent regulation of mTOR by LKB1-AMPK_Homo sapiens_R-HSA-380972(13.1);mTOR signalling_Homo sapiens_R-HSA-165159(12.2);PKB-mediated events_Homo sapiens_R-HSA-109703(12.1);Macroautophagy_Homo sapiens_R-HSA-1632852(10.7);
17	16	5	HAEMATOPOIETIC_AND_LYMPHOID_TISSUE(7.9);			1533
18	16	1
19	15	6				28		FA complex (Fanconi anemia complex) (human)(13.3);BRAFT complex (human)(12.8);FA complex (Fanconi anemia complex), cytoplasmic (human)(12.7);Nucleic and chromatin Fanconi complex (human)(12.0);	non-recombinational interstrand cross-link repair (GO:0036299)(29.8);recombinational interstrand cross-link repair (GO:0036298)(29.7);nucleotide-excision repair involved in interstrand cross-link repair (GO:1901255)(27.2);interstrand cross-link repair (GO:0036297)(23.2);DNA synthesis involved in DNA repair (GO:0000731)(18.2);		Fanconi anemia pathway_Homo sapiens_hsa03460(32.2);	Fanconi anemia pathway_Homo sapiens_6befb873-6192-11e5-8ac5-06603eb7f303(23.3);BARD1 signaling events_Homo sapiens_75b04491-618c-11e5-8ac5-06603eb7f303(13.6);	Fanconi Anemia Pathway_Homo sapiens_R-HSA-6783310(31.4);
20	13	64				11			early endosome to Golgi transport (GO:0034498)(16.3);retrograde transport, endosome to Golgi (GO:0042147)(13.1);recycling endosome to Golgi transport (GO:0071955)(13.9);late endosome to Golgi transport (GO:0034499)(13.8);endosome to lysosome transport (GO:0008333)(7.2);	trans-Golgi network (GO:0005802)(8.3);			Retrograde transport at the Trans-Golgi-Network_Homo sapiens_R-HSA-6811440(21.0);Intra-Golgi and retrograde Golgi-to-ER traffic_Homo sapiens_R-HSA-6811442(15.7);
21	13	104	OVARY(4.3);			1		RAD17-RFC-9-1-1 checkpoint supercomplex (human)(11.1);9-1-1 complex (human)(9.7);RAD9-RAD1-HUS1-APE1 complex (human)(9.1);FEN1-9-1-1 complex (human)(9.1);LIG1-9-1-1 complex (human)(9.1);	DNA damage checkpoint (GO:0000077)(10.9);cellular response to ionizing radiation (GO:0071479)(11.8);double-strand break repair (GO:0006302)(9.3);histone H3-K56 acetylation in response to DNA damage (GO:0097044)(9.1);cellular response to DNA damage stimulus (GO:0006974)(9.1);			Fanconi anemia pathway_Homo sapiens_6befb873-6192-11e5-8ac5-06603eb7f303(15.4);ATR signaling pathway_Homo sapiens_8991cbac-618b-11e5-8ac5-06603eb7f303(13.2);ATM pathway_Homo sapiens_49bc3e2b-618b-11e5-8ac5-06603eb7f303(10.9);Regulation of Telomerase_Homo sapiens_4dfe97ca-6195-11e5-8ac5-06603eb7f303(7.1);	G2/M DNA damage checkpoint_Homo sapiens_R-HSA-69473(21.9);Processing of DNA double-strand break ends_Homo sapiens_R-HSA-5693607(21.7);HDR through Homologous Recombination (HR) or Single Strand Annealing (SSA)_Homo sapiens_R-HSA-5693567(20.2);Homology Directed Repair_Homo sapiens_R-HSA-5693538(20.0);DNA Double-Strand Break Repair_Homo sapiens_R-HSA-5693532(19.1);
22	13	66	KIDNEY(4.7);			1		Conserved oligomeric Golgi (COG) complex (human)(22.3);COG1-COG8-COG5-COG6-COG7 subcomplex (human)(12.3);COG1-COG8-COG2-COG3-COG4 subcomplex (human)(12.3);COG5-COG6-COG7 subcomplex (human)(9.7);COG2-COG3-COG4 subcomplex (human)(9.7);	vesicle targeting, rough ER to cis-Golgi (GO:0048207)(16.5);endoplasmic reticulum-Golgi intermediate compartment (ERGIC) derived vesicle fusion with Golgi cis cisterna membrane (GO:1990689)(16.5);COPII vesicle uncoating (GO:0090112)(16.5);COPII-coated vesicle budding (GO:0090114)(16.4);endoplasmic reticulum-derived vesicle fusion with endoplasmic reticulum-Golgi intermediate compartment (ERGIC) m…				Intra-Golgi traffic_Homo sapiens_R-HSA-6811438(21.4);COPI-mediated anterograde transport_Homo sapiens_R-HSA-6807878(19.0);ER to Golgi Anterograde Transport_Homo sapiens_R-HSA-199977(16.9);Transport to the Golgi and subsequent modification_Homo sapiens_R-HSA-948021(16.1);Intra-Golgi and retrograde Golgi-to-ER traffic_Homo sapiens_R-HSA-6811442(15.7);
23	13	3		chr19q(10.6);
24	12	48							positive regulation of cholesterol biosynthetic process (GO:0045542)(8.3);negative regulation of cholesterol biosynthetic process (GO:0045541)(8.2);regulation of cholesterol biosynthetic process (GO:0045540)(8.2);				Regulation of cholesterol biosynthesis by SREBP (SREBF)_Homo sapiens_R-HSA-1655829(7.6);
25	12	7	CENTRAL_NERVOUS_SYSTEM(5.2);			38			galactosaminoglycan biosynthetic process (GO:0006025)(16.5);peptidoglycan biosynthetic process (GO:0009252)(16.5);heparin biosynthetic process (GO:0030210)(16.2);hyaluronan biosynthetic process (GO:0030213)(16.0);glycosaminoglycan biosynthetic process (GO:0006024)(15.6);		Glycosaminoglycan biosynthesis - heparan sulfate / heparin_Homo sapiens_hsa00534(21.2);		Glycosaminoglycan metabolism_Homo sapiens_R-HSA-1630316(12.7);Heparan sulfate/heparin (HS-GAG) metabolism_Homo sapiens_R-HSA-1638091(12.6);HS-GAG biosynthesis_Homo sapiens_R-HSA-2022928(8.6);
26	12	15				7		Pex26-Pex6-Pex1 complex (human)(9.8);	protein import into peroxisome matrix (GO:0016558)(28.0);protein import into peroxisome matrix, docking (GO:0016560)(24.9);protein import into peroxisome matrix, translocation (GO:0016561)(24.4);protein import into peroxisome matrix, substrate release (GO:0044721)(21.9);protein import into peroxisome matrix, receptor recycling (GO:0016562)(19.2);	glycosome (GO:0020015)(25.0);P3 peroxisome (GO:0019821)(25.0);P4 peroxisome (GO:0019822)(25.0);peroxisomal part (GO:0044439)(25.0);P1 peroxisome (GO:0019819)(25.0);	Peroxisome_Homo sapiens_hsa04146(28.9);
27	12	4
28	12	78		chr7q(3.5);		10
29	12	2		chr20q(9.3);
30	12	4	LUNG(4.3);	chr1q(7.4);
31	11	22	PANCREAS(3.9);			2		Wave-2 complex (mouse)(9.3);Wave-2 complex (Rac-activated) (mouse)(8.9);Wave-2 complex (human)(8.9);	Fc-gamma receptor signaling pathway involved in phagocytosis (GO:0038096)(15.3);positive regulation of lamellipodium assembly (GO:0010592)(9.5);		Fc gamma R-mediated phagocytosis_Homo sapiens_hsa04666(6.9);	RAC1 signaling pathway_Homo sapiens_faffa4fc-6194-11e5-8ac5-06603eb7f303(15.6);ErbB1 downstream signaling_Homo sapiens_30d60550-6192-11e5-8ac5-06603eb7f303(13.5);PDGFR-beta signaling pathway_Homo sapiens_c901a3e4-6194-11e5-8ac5-06603eb7f303(12.9);	Regulation of actin dynamics for phagocytic cup formation_Homo sapiens_R-HSA-2029482(16.4);Fcgamma receptor (FCGR) dependent phagocytosis_Homo sapiens_R-HSA-2029480(15.7);RHO GTPases Activate WASPs and WAVEs_Homo sapiens_R-HSA-5663213(17.0);
32	11	18				5
33	11	3	SKIN(3.6);
34	11	3						GAA1-GPI8-PIGT-PIG-PIGS complex (human)(12.6);	preassembly of GPI anchor in ER membrane (GO:0016254)(21.1);attachment of GPI anchor to protein (GO:0016255)(16.0);GPI anchor biosynthetic process (GO:0006506)(11.1);GPI anchor biosynthetic process via N-alanyl-glycosylphosphatidylinositolethanolamine (GO:0018270)(12.7);GPI anchor biosynthetic process via N-aspartyl-glycosylphosphatidylinositolethanolamine (GO:0018266)(12.7);		Glycosylphosphatidylinositol(GPI)-anchor biosynthesis_Homo sapiens_hsa00563(28.9);		Post-translational modification: synthesis of GPI-anchored proteins_Homo sapiens_R-HSA-163125(28.9);Synthesis of glycosylphosphatidylinositol (GPI)_Homo sapiens_R-HSA-162710(16.4);Attachment of GPI anchor to uPAR_Homo sapiens_R-HSA-162791(11.8);
35	11	2
36	11	2		chr7q(3.6);
37	10	59	KIDNEY(3.7);			1			protein ufmylation (GO:0071569)(15.7);regulation of intracellular estrogen receptor signaling pathway (GO:0033146)(15.3);positive regulation of intracellular estrogen receptor signaling pathway (GO:0033148)(13.7);negative regulation of intracellular estrogen receptor signaling pathway (GO:0033147)(12.8);response to endoplasmic reticulum stress (GO:0034976)(10.3);
38	10	10	OVARY(7.2);KIDNEY(4.3);			259							Tight junction interactions_Homo sapiens_R-HSA-420029(9.1);Cell-cell junction organization_Homo sapiens_R-HSA-421270(7.8);Cell junction organization_Homo sapiens_R-HSA-446728(7.2);
39	10	210				1215
40	10	156				1
41	10	9				17
42	9	8		chr14q(3.4);		16			detection of chemical stimulus involved in magnetoreception (GO:0050969)(12.3);detection of chemical stimulus involved in sensory perception of taste (GO:0050912)(12.2);detection of chemical stimulus involved in sensory perception (GO:0050907)(12.0);detection of chemical stimulus involved in sensory perception of pain (GO:0050968)(11.8);
43	9	6	AUTONOMIC_GANGLIA(5.5);			1744
44	9	51	KIDNEY(3.6);		317	182			COPII vesicle coating (GO:0048208)(13.0);vesicle targeting, rough ER to cis-Golgi (GO:0048207)(8.6);endoplasmic reticulum-Golgi intermediate compartment (ERGIC) derived vesicle fusion with Golgi cis cisterna membrane (GO:1990689)(8.6);COPII vesicle uncoating (GO:0090112)(8.6);COPII-coated vesicle budding (GO:0090114)(8.6);				COPII (Coat Protein 2) Mediated Vesicle Transport_Homo sapiens_R-HSA-204005(15.9);ER to Golgi Anterograde Transport_Homo sapiens_R-HSA-199977(13.8);Transport to the Golgi and subsequent modification_Homo sapiens_R-HSA-948021(13.1);
45	9	1
46	9	82				1
47	9	206				1
48	9	82		chr1q(6.5);		169
49	8	60				54		CTLH complex (human)(9.4);
50	8	162	KIDNEY(3.5);			257		CTF18-CTF8-DCC1-RFC3 complex (human)(9.8);CTF18-cohesion-RFC-POLH complex (human)(8.6);DNA synthesome complex (17 subunits) (human)(7.5);	telomeric DNA-containing double minutes formation (GO:0061819)(12.4);telomere maintenance via recombination (GO:0000722)(10.9);replication of extrachromosomal circular DNA (GO:0001326)(9.7);DNA synthesis involved in DNA replication (GO:0090592)(9.6);DNA-dependent DNA replication (GO:0006261)(9.4);		DNA replication_Homo sapiens_hsa03030(12.1);Base excision repair_Homo sapiens_hsa03410(9.4);Nucleotide excision repair_Homo sapiens_hsa03420(8.7);
51	8	62				261		mTORC2 complex (mTOR/FRAP1, LST8, mAVO3/RICTOR, SIN1) (human)(14.0);mTORC2 complex (mTOR/FRAP1, LST8, mAVO3/RICTOR) (human)(10.4);RICTOR-mTOR complex (human)(10.4);	phosphatidylinositol-mediated signaling (GO:0048015)(15.3);phosphatidylinositol 3-kinase signaling (GO:0014065)(14.9);		mTOR signaling pathway_Homo sapiens_hsa04150(13.8);Prostate cancer_Homo sapiens_hsa05215(7.6);Choline metabolism in cancer_Homo sapiens_hsa05231(7.4);	CXCR3-mediated signaling events_Homo sapiens_3a38a0ca-6191-11e5-8ac5-06603eb7f303(18.0);CXCR4-mediated signaling events_Homo sapiens_46a5529b-6191-11e5-8ac5-06603eb7f303(15.3);ErbB1 downstream signaling_Homo sapiens_30d60550-6192-11e5-8ac5-06603eb7f303(15.1);Class I PI3K signaling events mediated by Akt_Homo sapiens_046a84e6-6191-11e5-8ac5-06603eb7f303(15.4);mTOR signaling pathway_Homo sapiens_55…	PI3K/AKT Signaling in Cancer_Homo sapiens_R-HSA-2219528(15.8);PI-3K cascade:FGFR3_Homo sapiens_R-HSA-5654710(14.7);PI-3K cascade:FGFR4_Homo sapiens_R-HSA-5654720(14.7);PIP3 activates AKT signaling_Homo sapiens_R-HSA-1257604(14.7);PI3K events in ERBB4 signaling_Homo sapiens_R-HSA-1250342(14.7);
52	8	10	OESOPHAGUS(3.5);		10	402			ERBB2-ERBB4 signaling pathway (GO:0038135)(9.1);ERBB2-ERBB3 signaling pathway (GO:0038133)(9.1);ERBB2 signaling pathway (GO:0038128)(9.0);				Signaling by ERBB2_Homo sapiens_R-HSA-1227986(8.8);GRB7 events in ERBB2 signaling_Homo sapiens_R-HSA-1306955(9.4);
53	8	65	PANCREAS(4.4);			612		Oligosaccharyltransferase complex (Stt3A variant) (human)(9.1);	protein N-linked N-acetylglucosaminylation via asparagine (GO:0071903)(11.7);protein N-linked N-acetylgalactosaminylation via asparagine (GO:0071904)(11.7);protein N-linked glucosylation via asparagine (GO:0071905)(11.7);protein N-linked glycosylation via asparagine (GO:0018279)(10.9);		Protein processing in endoplasmic reticulum_Homo sapiens_hsa04141(11.0);
54	8	7				15
55	8	8	BREAST(3.5);			2182
56	8	52				18		INO80 chromatin remodeling complex (human)(18.3);		Ino80 complex (GO:0031011)(16.4);			DNA Damage Recognition in GG-NER_Homo sapiens_R-HSA-5696394(18.4);Global Genome Nucleotide Excision Repair (GG-NER)_Homo sapiens_R-HSA-5696399(15.9);Nucleotide Excision Repair_Homo sapiens_R-HSA-5696398(15.1);
57	8	2		chr20q(4.4);
58	8	6				41
59	8	6	AUTONOMIC_GANGLIA(3.3);			371
60	8	2	ENDOMETRIUM(3.5);	chr11q(9.3);
61	7	41				1969			Golgi to plasma membrane transport (GO:0006893)(9.7);	specific granule (GO:0042581)(8.1);			Translocation of GLUT4 to the plasma membrane_Homo sapiens_R-HSA-1445148(8.6);
62	7	124				1
63	7	126						RAD51B-RAD51C-RAD51D-XRCC2-XRCC3 complex (human)(9.6);hRAD51C-hXRCC3 complex (human)(7.0);RAD51C-XRCC3 complex (human)(7.0);	replication-born double-strand break repair via sister chromatid exchange (GO:1990414)(17.4);double-strand break repair via synthesis-dependent strand annealing (GO:0045003)(17.4);double-strand break repair via break-induced replication (GO:0000727)(17.2);DNA synthesis involved in double-strand break repair via homologous recombination (GO:0043150)(16.7);double-strand break repair via homologous …	cytoplasmic replication fork (GO:0043597)(14.8);replication fork (GO:0005657)(14.8);nuclear replication fork (GO:0043596)(13.7);	Homologous recombination_Homo sapiens_hsa03440(16.4);		Resolution of D-loop Structures through Synthesis-Dependent Strand Annealing (SDSA)_Homo sapiens_R-HSA-5693554(16.7);Resolution of D-loop Structures through Holliday Junction Intermediates_Homo sapiens_R-HSA-5693568(16.1);Resolution of D-Loop Structures_Homo sapiens_R-HSA-5693537(16.1);Homologous DNA Pairing and Strand Exchange_Homo sapiens_R-HSA-5693579(15.4);HDR through Homologous Recombination…
64	7	131	SKIN(6.3);		317	626		DA complex (human)(14.6);DAB complex (human)(14.5);TFIID complex (human)(11.6);TFIID complex, B-cell specific (human)(11.6);TFIID-beta complex (human)(11.4);	maintenance of transcriptional fidelity during DNA-templated transcription elongation from RNA polymerase II promoter (GO:0001193)(10.4);regulation of signal transduction by p53 class mediator (GO:1901796)(9.7);regulation of intrinsic apoptotic signaling pathway by p53 class mediator (GO:1902253)(9.7);negative regulation of signal transduction by p53 class mediator (GO:1901797)(9.7);regulation of…	TAF4B-containing transcription factor TFIID complex (GO:0070556)(16.1);transcription factor TFIID complex (GO:0005669)(13.8);transcription factor TFTC complex (GO:0033276)(8.7);	Basal transcription factors_Homo sapiens_hsa03022(15.2);Herpes simplex infection_Homo sapiens_hsa05168(6.6);		RNA Polymerase II HIV Promoter Escape_Homo sapiens_R-HSA-167162(12.1);RNA Polymerase II Promoter Escape_Homo sapiens_R-HSA-73776(12.1);HIV Transcription Initiation_Homo sapiens_R-HSA-167161(12.1);RNA Polymerase II Transcription Initiation And Promoter Clearance_Homo sapiens_R-HSA-76042(12.1);RNA Polymerase II Transcription Pre-Initiation And Promoter Opening_Homo sapiens_R-HSA-73779(12.1);
65	7	45				2
66	7	19				17
67	7	222
68	7	19				1
69	7	243				33
70	7	2
71	7	20		chr15q(5.3);
72	7	3		chr1p(7.5);
73	7	6		chr7q(6.9);		54
74	6	6	CENTRAL_NERVOUS_SYSTEM(7.0);			180			protein localization to nuclear envelope (GO:0090435)(9.7);protein localization to condensed nuclear chromosome (GO:1903084)(7.7);protein localization to nuclear periphery (GO:1990139)(7.7);protein localization to nucleoplasm (GO:1990173)(7.7);protein localization to Mmi1 nuclear focus complex (GO:1902666)(7.7);				Depolymerisation of the Nuclear Lamina_Homo sapiens_R-HSA-4419969(19.2);Nuclear Envelope Breakdown_Homo sapiens_R-HSA-2980766(15.7);Mitotic Prophase_Homo sapiens_R-HSA-68875(13.7);Initiation of Nuclear Envelope Reformation_Homo sapiens_R-HSA-2995383(11.8);Nuclear Envelope Reassembly_Homo sapiens_R-HSA-2995410(11.8);
75	6	16	LARGE_INTESTINE(9.1);			1454
76	6	15	LUNG(4.5);			228	AKR1B15(6.9)
77	6	9				1
78	6	10				26
79	6	13	PANCREAS(3.6);			101
80	6	12				13
81	6	275							phagosome acidification involved in apoptotic cell clearance (GO:0090390)(10.4);phagosome acidification (GO:0090383)(10.0);insulin receptor signaling pathway involved in dauer larval development (GO:1903107)(8.8);transferrin transport (GO:0033572)(8.8);insulin receptor signaling pathway via phosphatidylinositol 3-kinase (GO:0038028)(8.8);	vacuolar proton-transporting V-type ATPase, V0 domain (GO:0000220)(8.7);	Vibrio cholerae infection_Homo sapiens_hsa05110(9.3);Synaptic vesicle cycle_Homo sapiens_hsa04721(8.9);Epithelial cell signaling in Helicobacter pylori infection_Homo sapiens_hsa05120(8.7);Rheumatoid arthritis_Homo sapiens_hsa05323(8.2);Oxidative phosphorylation_Homo sapiens_hsa00190(7.6);		Insulin receptor recycling_Homo sapiens_R-HSA-77387(10.5);Transferrin endocytosis and recycling_Homo sapiens_R-HSA-917977(10.3);ROS, RNS production in response to bacteria_Homo sapiens_R-HSA-1222556(10.0);Iron uptake and transport_Homo sapiens_R-HSA-917937(9.6);
82	6	2		chr17p(4.8);
83	6	56		chr6p(4.8);							Systemic lupus erythematosus_Homo sapiens_hsa05322(10.1);Alcoholism_Homo sapiens_hsa05034(9.5);		HDACs deacetylate histones_Homo sapiens_R-HSA-3214815(9.0);HATs acetylate histones_Homo sapiens_R-HSA-3214847(7.9);
84	6	186	SKIN(4.2);		172	391
85	6	254				1
86	6	92
87	6	242				236
88	6	7		chr11q(4.4);		7
89	6	77				36
90	6	266				154
91	6	26		chr17q(5.1);
92	5	15				10		TSC1-TSC2 complex (human)(7.3);
93	5	130	HAEMATOPOIETIC_AND_LYMPHOID_TISSUE(3.3);			688					Selenocompound metabolism_Homo sapiens_hsa00450(8.3);
94	5	45				17
95	5	175				50
96	5	7				9			protein N-linked glycosylation via tryptophan (GO:0018244)(10.8);protein N-linked glycosylation via arginine (GO:0042543)(10.7);N-terminal protein amino acid N-linked glycosylation (GO:0035629)(10.6);protein N-linked glycosylation (GO:0006487)(9.4);protein N-linked glycosylation via asparagine (GO:0018279)(9.4);		N-Glycan biosynthesis_Homo sapiens_hsa00510(9.8);		Biosynthesis of the N-glycan precursor (dolichol lipid-linked oligosaccharide, LLO) and transfer to a nascent protein_Homo sapiens_R-HSA-446193(9.0);
97	5	152				1			telomeric 3' overhang formation (GO:0031860)(15.6);protection from non-homologous end joining at telomere (GO:0031848)(15.5);negative regulation of telomere maintenance via telomerase (GO:0032211)(13.8);telomere capping (GO:0016233)(13.8);	CST complex (GO:1990879)(16.5);nuclear telomere cap complex (GO:0000783)(11.4);nuclear telomeric heterochromatin (GO:0005724)(11.2);nuclear chromosome, telomeric region (GO:0000784)(11.1);
98	5	5				21			lipid particle organization (GO:0034389)(8.7);lipid droplet disassembly (GO:1905691)(8.6);lipid droplet formation (GO:0140042)(8.6);				COPI-independent Golgi-to-ER retrograde traffic_Homo sapiens_R-HSA-6811436(7.6);
99	5	14				39	NRAS(8.5)
100	5	2							substrate localization to autophagosome (GO:0061753)(10.5);autophagosome assembly (GO:0000045)(10.4);engulfment of target by autophagosome (GO:0061736)(10.2);protein localization to pre-autophagosomal structure (GO:0034497)(9.5);protein lipidation involved in autophagosome assembly (GO:0061739)(8.5);	pre-autophagosomal structure (GO:0000407)(8.3);			Macroautophagy_Homo sapiens_R-HSA-1632852(9.2);
101	5	49			72	92		p27-cyclinE-Cdk2 - Ubiquitin E3 ligase (SKP1A, SKP2, CUL1, CKS1B, RBX1) complex (human)(13.3);CDK2-CCNE1 complex (human)(7.3);p27-cyclinE-CDK2 complex (human)(6.8);			Small cell lung cancer_Homo sapiens_hsa05222(11.9);Cell cycle_Homo sapiens_hsa04110(8.2);	FOXM1 transcription factor network_Homo sapiens_c51cda49-6192-11e5-8ac5-06603eb7f303(10.2);Regulation of retinoblastoma protein_Homo sapiens_407a3468-6195-11e5-8ac5-06603eb7f303(9.3);	Mitotic G1-G1/S phases_Homo sapiens_R-HSA-453279(10.9);SCF(Skp2)-mediated degradation of p27/p21_Homo sapiens_R-HSA-187577(9.5);Cyclin E associated events during G1/S transition_Homo sapiens_R-HSA-69202(9.2);Cyclin A:Cdk2-associated events at S phase entry_Homo sapiens_R-HSA-69656(9.2);G1/S Transition_Homo sapiens_R-HSA-69206(8.3);
102	5	9	AUTONOMIC_GANGLIA(4.0);			195						IGF1 pathway_Homo sapiens_5e904cd6-6193-11e5-8ac5-06603eb7f303(7.6);
103	5	20	OVARY(3.6);			21					NF-kappa B signaling pathway_Homo sapiens_hsa04064(8.7);TNF signaling pathway_Homo sapiens_hsa04668(8.4);	TNF receptor signaling pathway_Homo sapiens_316be05e-6196-11e5-8ac5-06603eb7f303(9.9);CD40/CD40L signaling_Homo sapiens_1971792f-6190-11e5-8ac5-06603eb7f303(7.5);	TNFR1-induced NFkappaB signaling pathway_Homo sapiens_R-HSA-5357956(11.0);TNF signaling_Homo sapiens_R-HSA-75893(10.1);Death Receptor Signalling_Homo sapiens_R-HSA-73887(9.8);Regulation of TNFR1 signaling_Homo sapiens_R-HSA-5357905(7.5);
104	5	19				1		Dolichol-phosphate mannose (DPM) synthase (human)(11.1);	GPI anchor biosynthetic process via N-asparaginyl-glycosylphosphatidylinositolethanolamine (GO:0018265)(8.1);GPI anchor biosynthetic process via N-glycyl-glycosylphosphatidylinositolethanolamine (GO:0018268)(8.1);GPI anchor biosynthetic process via N-seryl-glycosylphosphatidylinositolethanolamine (GO:0018269)(8.1);GPI anchor biosynthetic process via N-cysteinyl-glycosylphosphatidylinositolethanol…		N-Glycan biosynthesis_Homo sapiens_hsa00510(13.1);		Biosynthesis of the N-glycan precursor (dolichol lipid-linked oligosaccharide, LLO) and transfer to a nascent protein_Homo sapiens_R-HSA-446193(12.1);Post-translational modification: synthesis of GPI-anchored proteins_Homo sapiens_R-HSA-163125(7.8);Synthesis of substrates in N-glycan biosythesis_Homo sapiens_R-HSA-446219(6.5);
105	5	274
106	5	73	HAEMATOPOIETIC_AND_LYMPHOID_TISSUE(5.0);			4		LARC complex (LCR-associated remodeling complex) (human)(15.4);EBAFa complex (human)(12.8);NUMAC complex (nucleosomal methylation activator complex) (human)(12.8);SWI-SNF chromatin remodeling-related-BRCA1 complex (human)(12.6);BRM-SIN3A-HDAC complex (human)(12.4);	DNA replication-dependent nucleosome disassembly (GO:0034725)(11.6);CENP-A containing nucleosome disassembly (GO:1905783)(11.6);DNA replication-independent nucleosome disassembly (GO:0034726)(11.6);nucleosome disassembly (GO:0006337)(11.3);chromatin remodeling (GO:0006338)(9.3);	Clr6 histone deacetylase complex I'' (GO:1990483)(10.4);HDA1 complex (GO:0070823)(10.4);Snt2C complex (GO:0070211)(10.4);Rpd3L-Expanded complex (GO:0070210)(10.4);nucleolar chromatin (GO:0030874)(10.4);			RMTs methylate histone arginines_Homo sapiens_R-HSA-3214858(10.0);
107	5	241				4
108	5	43	URINARY_TRACT(3.6);			359
109	5	94
110	5	166				389
111	5	8				32
112	5	106							maintenance of transcriptional fidelity during DNA-templated transcription elongation from RNA polymerase II promoter (GO:0001193)(8.7);
113	5	46			16			C complex spliceosome (human)(6.2);
114	5	1		chr1p(5.4);
115	5	153						Phosphatidylinositol 3-kinase complex (PIK3C3, PIK3R4) (human)(7.3);	regulation of cytokinetic process (GO:0032954)(11.6);regulation of FtsZ-dependent cytokinesis (GO:2000244)(11.6);regulation of cytokinesis (GO:0032465)(10.8);negative regulation of cytokinesis (GO:0032466)(10.6);regulation of mitotic cytokinesis (GO:1902412)(9.8);	late endosome membrane (GO:0031902)(8.3);	Regulation of autophagy_Homo sapiens_hsa04140(7.2);		Macroautophagy_Homo sapiens_R-HSA-1632852(9.2);
116	5	7				902
117	5	1
118	5	237	LARGE_INTESTINE(4.1);			66		CDC7-DBF7 complex (human)(7.3);
119	5	256				114
120	5	262				96
121	5	156	PANCREAS(3.6);
122	5	4
123	5	147
124	5	62
125	5	265				11
126	5	8				18
127	5	2		chr22q(2.8);
128	5	4		chr1p(7.9);
129	5	214
130	5	7				10
131	5	4
132	5	3
133	5	7				14
134	5	3
135	5	4	UPPER_AERODIGESTIVE_TRACT(3.4);	chr11q(4.6);
136	4	101						Shp2-Sos complex, FGF stimulated (mouse)(7.5);GRB2-SHP-2 complex, PDGF stimulated (human)(7.5);Grb2-mSos1 complex (mouse)(7.5);Grb2-Shp2 complex, FGF stimulated (mouse)(7.5);BCR-ABL (p210 fusion protein)-GRB2-SOS1 complex (human)(7.5);	ERBB2 signaling pathway (GO:0038128)(10.8);epidermal growth factor receptor signaling pathway involved in heart process (GO:1905251)(10.4);epidermal growth factor signaling pathway involved in forebrain neuron fate commitment (GO:0022026)(10.4);epidermal growth factor receptor signaling pathway involved in lung development (GO:0060507)(10.4);epidermal growth factor receptor signaling pathway via …		Renal cell carcinoma_Homo sapiens_hsa05211(10.0);Neurotrophin signaling pathway_Homo sapiens_hsa04722(8.9);Phospholipase D signaling pathway_Homo sapiens_hsa04072(8.6);	EPO signaling pathway_Homo sapiens_20fe3c0e-6192-11e5-8ac5-06603eb7f303(11.2);EGF receptor (ErbB1) signaling pathway_Homo sapiens_NULL(11.2);Signaling events regulated by Ret tyrosine kinase_Homo sapiens_e4431190-6195-11e5-8ac5-06603eb7f303(11.0);IL6-mediated signaling events_Homo sapiens_e684d5d2-6193-11e5-8ac5-06603eb7f303(10.6);Signaling events mediated by Stem cell factor receptor (c-Kit)_Hom…	Role of LAT2/NTAL/LAB on calcium mobilization_Homo sapiens_R-HSA-2730905(8.4);Signaling by FGFR3 fusions in cancer_Homo sapiens_R-HSA-8853334(9.4);Signaling by FGFR4 in disease_Homo sapiens_R-HSA-5655291(9.3);Signaling by EGFRvIII in Cancer_Homo sapiens_R-HSA-5637812(8.9);Constitutive Signaling by EGFRvIII_Homo sapiens_R-HSA-5637810(8.9);
137	4	21
138	4	257						PAC1-PAC2 complex (human)(7.5);PAC3-PAC4 complex (human)(7.5);
139	4	156							positive regulation of TORC2 signaling (GO:1904515)(11.5);positive regulation of TORC1 signaling (GO:1904263)(11.2);cellular response to leucine starvation (GO:1990253)(11.0);positive regulation of transcription from RNA polymerase II promoter in response to amino acid starvation (GO:0061412)(10.8);positive regulation of TOR signaling (GO:0032008)(10.7);
140	4	26
141	4	24											TP53 regulates transcription of additional cell cycle genes whose exact role in the p53 pathway remain uncertain_Homo sapiens_R-HSA-6804115(8.4);Deadenylation of mRNA_Homo sapiens_R-HSA-429947(8.3);TP53 Regulates Transcription of Cell Cycle Genes_Homo sapiens_R-HSA-6791312(7.3);Deadenylation-dependent mRNA decay_Homo sapiens_R-HSA-429914(7.2);
142	4	40	SKIN(3.6);	chr17q(3.1);		14			positive regulation of bile acid metabolic process (GO:1904253)(10.2);positive regulation of cellular biosynthetic process (GO:0031328)(10.2);positive regulation of glucocorticoid metabolic process (GO:0031945)(10.2);positive regulation of cellular metabolic process (GO:0031325)(10.0);positive regulation of isoprenoid metabolic process (GO:0045828)(10.0);				ChREBP activates metabolic gene expression_Homo sapiens_R-HSA-163765(9.8);Fatty Acyl-CoA Biosynthesis_Homo sapiens_R-HSA-75105(7.5);
143	4	220				19
144	4	181	CENTRAL_NERVOUS_SYSTEM(6.7);			856
145	4	56
146	4	239	SKIN(4.1);			5			negative regulation of transcription from RNA polymerase II promoter in response to hypoxia (GO:0061428)(9.6);positive regulation of transcription from RNA polymerase II promoter in response to hypoxia (GO:0061419)(9.4);regulation of transcription from RNA polymerase II promoter in response to hypoxia (GO:0061418)(8.8);		Renal cell carcinoma_Homo sapiens_hsa05211(6.9);	Hypoxic and oxygen homeostasis regulation of HIF-1-alpha_Homo sapiens_4c0f3584-6193-11e5-8ac5-06603eb7f303(8.6);	Oxygen-dependent proline hydroxylation of Hypoxia-inducible Factor Alpha_Homo sapiens_R-HSA-1234176(8.6);Cellular response to hypoxia_Homo sapiens_R-HSA-2262749(8.1);Regulation of Hypoxia-inducible Factor (HIF) by oxygen_Homo sapiens_R-HSA-1234174(8.1);
147	4	14	LARGE_INTESTINE(4.2);			419
148	4	50				24			ubiquitin-dependent glycoprotein ERAD pathway (GO:0097466)(10.0);retrograde protein transport, ER to cytosol (GO:0030970)(8.0);
149	4	12				24
150	4	112											SUMOylation of DNA damage response and repair proteins_Homo sapiens_R-HSA-3108214(9.7);SUMO E3 ligases SUMOylate target proteins_Homo sapiens_R-HSA-3108232(9.3);SUMOylation_Homo sapiens_R-HSA-2990846(9.2);
151	4	6	SKIN(3.6);			183
152	4	4
153	4	100	SKIN(6.3);
154	4	47
155	4	227	CENTRAL_NERVOUS_SYSTEM(4.7);SKIN(6.2);			443			positive regulation of viral transcription (GO:0050434)(7.8);positive regulation by host of viral transcription (GO:0043923)(7.5);				Abortive elongation of HIV-1 transcript in the absence of Tat_Homo sapiens_R-HSA-167242(8.3);Pausing and recovery of Tat-mediated HIV elongation_Homo sapiens_R-HSA-167238(7.9);Tat-mediated HIV elongation arrest and recovery_Homo sapiens_R-HSA-167243(7.9);Elongation arrest and recovery_Homo sapiens_R-HSA-112387(7.8);HIV elongation arrest and recovery_Homo sapiens_R-HSA-167287(7.8);
156	4	18	CENTRAL_NERVOUS_SYSTEM(7.0);			607
157	4	81				5
158	4	0
159	4	8	OESOPHAGUS(3.8);			69		ITGA3-ITGB1-CD151 complex (human)(11.5);ITGA3-ITGB1 complex (human)(7.5);ITGA3-ITGB1-BSG complex (human)(7.0);ITGA6-ITGB1-CD151 complex (human)(7.0);ITGA3-ITGB1-CD63 complex (human)(7.0);
160	4	24				1			histone H3-K79 acetylation (GO:0043976)(7.5);histone H3-K36 acetylation (GO:0043975)(7.5);histone H3-K23 acetylation (GO:0043972)(7.5);histone H3-K56 acetylation (GO:0097043)(7.5);histone H3-K27 acetylation (GO:0043974)(7.5);
161	4	87				97			G2/M transition of mitotic cell cycle (GO:0000086)(8.8);			FOXM1 transcription factor network_Homo sapiens_c51cda49-6192-11e5-8ac5-06603eb7f303(7.5);PLK1 signaling events_Homo sapiens_e5e87977-6194-11e5-8ac5-06603eb7f303(7.3);	G2/M Transition_Homo sapiens_R-HSA-69275(8.3);Mitotic G2-G2/M phases_Homo sapiens_R-HSA-453274(8.2);Cyclin A/B1 associated events during G2/M transition_Homo sapiens_R-HSA-69273(8.3);
162	4	275	CENTRAL_NERVOUS_SYSTEM(3.3);
163	4	5	ENDOMETRIUM(3.3);			12
164	4	273						eIF3 complex (EIF3S6, EIF3S5, EIF3S4, EIF3S3, EIF3S6IP, EIF3S2, EIF3S9, EIF3S12, EIF3S10, EIF3S8, EIF3S1, EIF3S7, PCID1) (human)(13.0);					Formation of the ternary complex, and subsequently, the 43S complex_Homo sapiens_R-HSA-72695(10.5);Ribosomal scanning and start codon recognition_Homo sapiens_R-HSA-72702(10.2);Translation initiation complex formation_Homo sapiens_R-HSA-72649(10.2);Activation of the mRNA upon binding of the cap-binding complex and eIFs, and subsequent binding to 43S_Homo sapiens_R-HSA-72662(10.2);Formation of a p…
165	4	1
166	4	258	LUNG(3.8);			1
167	4	3
168	4	276
169	4	6				19
170	4	104						SRCAP-associated chromatin remodeling complex (human)(9.4);
171	4	276						Mediator complex (human)(7.8);
172	4	50			133
173	4	5		chr1p(3.9);		20
174	4	5				289
175	4	1
176	4	185				2
177	4	4	PANCREAS(3.4);
178	4	5	LUNG(4.9);	chr1q(4.6);		28
179	4	3						AP1 adaptor complex (human)(9.8);Gamma-BAR-AP1 complex (human)(9.6);Kif13a-AP1 complex (mouse)(6.5);		Cvt vesicle membrane (GO:0033110)(10.5);cytoplasmic vesicle membrane (GO:0030659)(10.5);organellar chromatophore membrane (GO:0070112)(10.5);clathrin coat of endocytic vesicle (GO:0030128)(7.4);			Nef mediated downregulation of MHC class I complex cell surface expression_Homo sapiens_R-HSA-164940(9.4);Nef-mediates down modulation of cell surface receptors by recruiting them to clathrin adapters_Homo sapiens_R-HSA-164938(8.4);The role of Nef in HIV-1 replication and disease pathogenesis_Homo sapiens_R-HSA-164952(8.0);Lysosome Vesicle Biogenesis_Homo sapiens_R-HSA-432720(7.7);Golgi Associate…
180	4	49
181	4	276
182	4	44
183	4	5		chr7p(3.3);		28
184	4	16				2
185	4	7		chr17q(4.8);		528
186	4	124
187	4	6	KIDNEY(3.5);			20					N-Glycan biosynthesis_Homo sapiens_hsa00510(7.3);
188	4	1
189	4	2	AUTONOMIC_GANGLIA(4.5);	chr17q(3.4);
190	4	139	SKIN(3.6);			47		Integrator complex (human)(9.2);Integrator-RNAPII complex (human)(9.0);	snRNA 5'-end processing (GO:1990273)(9.1);snRNA 3'-end processing (GO:0034472)(9.1);snRNA processing (GO:0016180)(9.0);
191	4	72							actin-dependent intracellular transport of virus (GO:0075520)(10.3);microtubule-dependent intracellular transport of viral material (GO:0075519)(10.3);viral penetration into host nucleus (GO:0075732)(10.3);transport of viral material towards nucleus (GO:0075606)(10.3);exit of virus from host cell nucleus (GO:0039674)(10.0);				NS1 Mediated Effects on Host Pathways_Homo sapiens_R-HSA-168276(10.9);Host Interactions with Influenza Factors_Homo sapiens_R-HSA-168253(10.8);ISG15 antiviral mechanism_Homo sapiens_R-HSA-1169408(9.8);Antiviral mechanism by IFN-stimulated genes_Homo sapiens_R-HSA-1169410(9.8);Influenza Infection_Homo sapiens_R-HSA-168254(8.6);
192	4	8	UPPER_AERODIGESTIVE_TRACT(4.0);			41
193	3	228				11		Condensin II (human)(11.1);					Condensation of Prophase Chromosomes_Homo sapiens_R-HSA-2299718(8.1);Mitotic Prophase_Homo sapiens_R-HSA-68875(6.8);
194	3	165				2
195	3	45				561
196	3	12				131		EED-EZH2 complex (human)(11.1);Polycomb repressive complex 2 (PRC2) (human)(11.1);EED-EZH polycomb complex (human)(7.8);EED-EZH-YY1 polycomb complex (human)(7.3);Polycomb repressive complex 4 (PRC4) (human)(7.3);		ESC/E(Z) complex (GO:0035098)(8.1);			PKMTs methylate histone lysines_Homo sapiens_R-HSA-3214841(8.1);PRC2 methylates histones and DNA_Homo sapiens_R-HSA-212300(8.1);Activation of anterior HOX genes in hindbrain development during early embryogenesis_Homo sapiens_R-HSA-5617472(7.1);Activation of HOX genes during differentiation_Homo sapiens_R-HSA-5619507(7.1);Oxidative Stress Induced Senescence_Homo sapiens_R-HSA-2559580(7.0);
197	3	11	CENTRAL_NERVOUS_SYSTEM(3.4);			9
198	3	18							CENP-A containing nucleosome assembly (GO:0034080)(8.0);				Nucleosome assembly_Homo sapiens_R-HSA-774815(7.8);Deposition of new CENPA-containing nucleosomes at the centromere_Homo sapiens_R-HSA-606279(7.8);Chromosome Maintenance_Homo sapiens_R-HSA-73886(7.1);Resolution of Sister Chromatid Cohesion_Homo sapiens_R-HSA-2500257(6.9);Mitotic Prometaphase_Homo sapiens_R-HSA-68877(6.8);
199	3	22				5		PBAF complex (Polybromo- and BAF containing complex) (human)(6.0);
200	3	193				163
201	3	105	AUTONOMIC_GANGLIA(3.4);			127
202	3	147				98		Prefoldin complex (human)(10.8);					Prefoldin mediated transfer of substrate to CCT/TriC_Homo sapiens_R-HSA-389957(8.7);Cooperation of Prefoldin and TriC/CCT in actin and tubulin folding_Homo sapiens_R-HSA-389958(8.4);Chaperonin-mediated protein folding_Homo sapiens_R-HSA-390466(7.0);Protein folding_Homo sapiens_R-HSA-391251(6.9);
203	3	6	SKIN(4.0);			30
204	3	11				9
205	3	84
206	3	3
207	3	32			23	2
208	3	3						Gamma-secretase complex (APH1A, PSEN1, PSENEN, NCSTN) (human)(11.5);Gamma-secretase complex (Aph1a, Psen1, Psenen, Ncstn) (mouse)(11.5);Gamma-secretase complex (APH1B, PSEN1, PSENEN, NCSTN) (human)(11.5);Gamma-secretase complex (APH1A, PSEN1, PSENEN, NCSTN variant) (human)(11.5);CD147-gamma-secretase complex (APH-1a, PS-1, PEN-2, NCT variant) (human)(11.1);	amyloid precursor protein metabolic process (GO:0042982)(10.2);amyloid precursor protein biosynthetic process (GO:0042983)(10.2);amyloid precursor protein catabolic process (GO:0042987)(9.8);amyloid-beta formation (GO:0034205)(9.5);PMA-inducible membrane protein ectodomain proteolysis (GO:0051088)(9.3);	gamma-secretase complex (GO:0070765)(10.8);	Notch signaling pathway_Homo sapiens_hsa04330(7.9);	Syndecan-3-mediated signaling events_Homo sapiens_052075b8-6196-11e5-8ac5-06603eb7f303(9.3);Presenilin action in Notch and Wnt signaling_Homo sapiens_f51de83a-6194-11e5-8ac5-06603eb7f303(7.9);Notch signaling pathway_Homo sapiens_88f83518-6194-11e5-8ac5-06603eb7f303(7.6);p75(NTR)-mediated signaling_Homo sapiens_b492782f-6194-11e5-8ac5-06603eb7f303(7.4);
209	3	35						BLM complex III (human)(7.0);	DNA synthesis involved in double-strand break repair via single-strand annealing (GO:0043151)(8.3);DNA synthesis involved in UV-damage excision repair (GO:1904161)(8.0);		Fanconi anemia pathway_Homo sapiens_hsa03460(7.8);		Resolution of D-loop Structures through Synthesis-Dependent Strand Annealing (SDSA)_Homo sapiens_R-HSA-5693554(8.7);Resolution of D-loop Structures through Holliday Junction Intermediates_Homo sapiens_R-HSA-5693568(8.4);Resolution of D-Loop Structures_Homo sapiens_R-HSA-5693537(8.4);HDR through Single Strand Annealing (SSA)_Homo sapiens_R-HSA-5685938(8.2);Presynaptic phase of homologous DNA pairi…
210	3	8				48
211	3	22				6
212	3	276
213	3	7				39							Pyruvate metabolism and Citric Acid (TCA) cycle_Homo sapiens_R-HSA-71406(7.9);
214	3	274
215	3	5				16			adherens junction maintenance (GO:0034334)(8.4);adherens junction organization (GO:0034332)(8.0);adherens junction assembly (GO:0034333)(7.8);		Adherens junction_Homo sapiens_hsa04520(7.3);	E-cadherin signaling in keratinocytes_Homo sapiens_a5f1af61-6191-11e5-8ac5-06603eb7f303(9.0);E-cadherin signaling in the nascent adherens junction_Homo sapiens_aef0d8c2-6191-11e5-8ac5-06603eb7f303(8.2);Stabilization and expansion of the E-cadherin adherens junction_Homo sapiens_f1a6cd94-6195-11e5-8ac5-06603eb7f303(8.1);Posttranslational regulation of adherens junction stability and dissassembly_H…	Adherens junctions interactions_Homo sapiens_R-HSA-418990(8.5);Cell-cell junction organization_Homo sapiens_R-HSA-421270(7.6);Cell junction organization_Homo sapiens_R-HSA-446728(7.1);
216	3	91							regulation of glucose transport (GO:0010827)(8.4);regulation of intestinal D-glucose absorption (GO:1903985)(8.4);tRNA re-export from nucleus (GO:0071528)(8.4);regulation of glucose import (GO:0046324)(8.3);positive regulation of glucose transport (GO:0010828)(8.2);		RNA transport_Homo sapiens_hsa03013(6.2);		Transport of Ribonucleoproteins into the Host Nucleus_Homo sapiens_R-HSA-168271(8.5);NEP/NS2 Interacts with the Cellular Export Machinery_Homo sapiens_R-HSA-168333(8.5);Regulation of Glucokinase by Glucokinase Regulatory Protein_Homo sapiens_R-HSA-170822(8.5);Export of Viral Ribonucleoproteins from Nucleus_Homo sapiens_R-HSA-168274(8.5);Nuclear import of Rev protein_Homo sapiens_R-HSA-180746(8.4);
217	3	88
218	3	6				12
219	3	3
220	3	133
221	3	205
222	3	5				37						IL1-mediated signaling events_Homo sapiens_68fce8e7-6193-11e5-8ac5-06603eb7f303(8.4);	Interleukin-1 signaling_Homo sapiens_R-HSA-446652(8.0);
223	3	110											COPI-dependent Golgi-to-ER retrograde traffic_Homo sapiens_R-HSA-6811434(7.2);
224	3	8	PANCREAS(3.9);			32
225	3	35				500			cholesterol biosynthetic process via 24,25-dihydrolanosterol (GO:0033488)(8.4);cholesterol biosynthetic process via desmosterol (GO:0033489)(8.3);cholesterol biosynthetic process via lathosterol (GO:0033490)(8.3);positive regulation of cholesterol biosynthetic process (GO:0045542)(8.2);negative regulation of cholesterol biosynthetic process (GO:0045541)(8.1);				Cholesterol biosynthesis_Homo sapiens_R-HSA-191273(8.9);Activation of gene expression by SREBF (SREBP)_Homo sapiens_R-HSA-2426168(8.1);Regulation of cholesterol biosynthesis by SREBP (SREBF)_Homo sapiens_R-HSA-1655829(7.7);
226	3	32	CENTRAL_NERVOUS_SYSTEM(4.0);			4				plus-end kinesin complex (GO:0005873)(7.9);			Kinesins_Homo sapiens_R-HSA-983189(8.0);COPI-dependent Golgi-to-ER retrograde traffic_Homo sapiens_R-HSA-6811434(7.2);
227	3	4	HAEMATOPOIETIC_AND_LYMPHOID_TISSUE(3.4);
228	3	95				813
229	3	4
230	3	276						Rnase/Mrp complex (human)(6.2);
231	3	29				429
232	3	146							miRNA metabolic process (GO:0010586)(9.7);miRNA catabolic process (GO:0010587)(9.4);miRNA 2'-O-methylation (GO:0061715)(9.4);mature miRNA 3'-end processing (GO:0044747)(9.3);				MicroRNA (miRNA) biogenesis_Homo sapiens_R-HSA-203927(8.9);Gene Silencing by RNA_Homo sapiens_R-HSA-211000(6.9);
233	3	228						Rnase/Mrp complex (human)(10.0);					tRNA processing in the nucleus_Homo sapiens_R-HSA-6784531(7.7);tRNA processing_Homo sapiens_R-HSA-72306(6.9);
234	3	12	CENTRAL_NERVOUS_SYSTEM(4.8);			255
235	3	1
236	3	211
237	3	14				7
238	3	5				90
239	3	8	SKIN(3.9);			44
240	3	2
241	3	4
242	3	65				77
243	3	276	SKIN(3.9);					PA700 complex (human)(9.1);PA700-20S-PA28 complex (human)(8.3);	regulation of 1-aminocyclopropane-1-carboxylate metabolic process (GO:0010602)(7.8);regulation of ornithine metabolic process (GO:0090368)(7.8);regulation of cellular amino acid biosynthetic process (GO:2000282)(7.8);positive regulation of cellular amino acid metabolic process (GO:0045764)(7.8);regulation of sulfur amino acid metabolic process (GO:0031335)(7.8);		Proteasome_Homo sapiens_hsa03050(8.0);		Regulation of activated PAK-2p34 by proteasome mediated degradation_Homo sapiens_R-HSA-211733(7.9);Cross-presentation of soluble exogenous antigens (endosomes)_Homo sapiens_R-HSA-1236978(7.9);Regulation of Apoptosis_Homo sapiens_R-HSA-169911(7.8);CDK-mediated phosphorylation and removal of Cdc6_Homo sapiens_R-HSA-69017(7.8);Regulation of ornithine decarboxylase (ODC)_Homo sapiens_R-HSA-350562(7.8…
244	3	33				17
245	3	62				224		ClpXP complex (human)(7.8);
246	3	155	HAEMATOPOIETIC_AND_LYMPHOID_TISSUE(6.2);			900
247	3	6				32
248	3	188	AUTONOMIC_GANGLIA(4.5);CENTRAL_NERVOUS_SYSTEM(6.3);			1377
249	3	5				75
250	3	14				136
251	3	18				18
252	3	274
253	3	5				79			response to retinoic acid (GO:0032526)(8.9);				Nuclear Receptor transcription pathway_Homo sapiens_R-HSA-383280(7.8);
254	3	5				50
255	3	1
256	3	119	CENTRAL_NERVOUS_SYSTEM(4.4);			522
257	3	3
258	3	14				6
259	3	62						RNF20-RNF40-UbE2E1 complex (human)(7.3);	histone H2B conserved C-terminal lysine ubiquitination (GO:0071894)(10.2);histone H2A monoubiquitination (GO:0035518)(8.7);histone monoubiquitination (GO:0010390)(8.2);
260	3	2
261	3	276							SRP-dependent cotranslational protein targeting to membrane, docking (GO:0006615)(7.1);SRP-dependent cotranslational protein targeting to membrane, translocation (GO:0006616)(7.0);SRP-dependent cotranslational protein targeting to membrane (GO:0006614)(6.9);SRP-dependent cotranslational protein targeting to membrane, signal sequence recognition (GO:0006617)(6.9);middle viral transcription (GO:001…	cytosolic large ribosomal subunit (GO:0022625)(7.4);	Ribosome_Homo sapiens_hsa03010(6.5);		Peptide chain elongation_Homo sapiens_R-HSA-156902(7.1);Viral mRNA Translation_Homo sapiens_R-HSA-192823(7.1);Selenocysteine synthesis_Homo sapiens_R-HSA-2408557(7.1);Eukaryotic Translation Termination_Homo sapiens_R-HSA-72764(7.1);Eukaryotic Translation Elongation_Homo sapiens_R-HSA-156842(7.1);
262	3	0
263	3	269				33
264	3	5				301
265	3	10				4
266	3	3
267	3	3	CENTRAL_NERVOUS_SYSTEM(3.6);
268	3	271				100
269	3	239				1
270	3	99				551
271	3	1
272	3	276						SNAPc (small nuclear RNA-activating protein) complex (human)(11.1);					RNA Polymerase III Transcription Initiation From Type 3 Promoter_Homo sapiens_R-HSA-76071(8.6);RNA Polymerase III Transcription Initiation_Homo sapiens_R-HSA-76046(8.3);RNA Polymerase III Abortive And Retractive Initiation_Homo sapiens_R-HSA-749476(8.1);RNA Polymerase III Transcription_Homo sapiens_R-HSA-74158(8.1);RNA polymerase II transcribes snRNA genes_Homo sapiens_R-HSA-6807505(7.3);
273	3	121			249	617
274	3	2
275	3	12				30
276	3	39	LARGE_INTESTINE(3.3);PANCREAS(10.1);		43	345	KRAS(18.9)
277	3	109				104		SMRT complex (human)(11.1);					NOTCH1 Intracellular Domain Regulates Transcription_Homo sapiens_R-HSA-2122947(7.9);Constitutive Signaling by NOTCH1 HD+PEST Domain Mutants_Homo sapiens_R-HSA-2894862(7.7);Constitutive Signaling by NOTCH1 PEST Domain Mutants_Homo sapiens_R-HSA-2644606(7.7);Signaling by NOTCH1 PEST Domain Mutants in Cancer_Homo sapiens_R-HSA-2644602(7.7);Signaling by NOTCH1 in Cancer_Homo sapiens_R-HSA-2644603(7.7…
278	3	79
279	3	10				1
280	3	106				149				anaphase-promoting complex (GO:0005680)(8.6);
281	3	76				259
282	3	222
283	3	9			12	30
284	3	3
285	3	22				12
286	3	276
287	3	259				9
288	3	2
289	3	7		chr10q(4.1);		17
290	3	1	AUTONOMIC_GANGLIA(3.8);
291	3	1										Canonical NF-kappaB pathway_Homo sapiens_7a1a9c3c-618f-11e5-8ac5-06603eb7f303(8.9);
292	3	208						CAND1-CUL3-RBX1 complex (human)(7.3);
293	3	147
294	3	225
295	3	214
296	3	243				5		CBF-DNA complex (human)(7.3);p32-CBF-DNA complex (human)(7.0);
297	3	6				4
298	3	1
299	3	1
300	3	3
301	3	5				239
302	3	270	CENTRAL_NERVOUS_SYSTEM(3.4);			42		CCT complex (chaperonin containing TCP1 complex) (mouse)(6.4);
303	3	269				6
304	3	23				1
305	3	253				98
306	3	3
307	3	2						BRAF-RAF1-14-3-3 complex (human)(10.2);Ksr1 complex (Ksr1, Mek, 14-3-3), unstimulated (mouse)(10.0);B-Ksr1-MEK-MAPK-14-3-3 complex (mouse)(10.0);Ksr1 complex (Ksr1, Mek, 14-3-3, Mapk), EGF stimulated (mouse)(9.9);Ksr1-CK2-MEK-14-3-3 complex, PDGF treated (mouse)(9.8);		Cvt vesicle membrane (GO:0033110)(7.9);organellar chromatophore membrane (GO:0070112)(7.9);cytoplasmic vesicle membrane (GO:0030659)(7.9);	Oocyte meiosis_Homo sapiens_hsa04114(6.6);Cell cycle_Homo sapiens_hsa04110(6.6);	p38 signaling mediated by MAPKAP kinases_Homo sapiens_9d980dbc-6194-11e5-8ac5-06603eb7f303(9.0);Insulin-mediated glucose transport_Homo sapiens_145e3376-6194-11e5-8ac5-06603eb7f303(8.7);Class I PI3K signaling events mediated by Akt_Homo sapiens_046a84e6-6191-11e5-8ac5-06603eb7f303(8.3);Trk receptor signaling mediated by PI3K and PLC-gamma_Homo sapiens_4037def0-6196-11e5-8ac5-06603eb7f303(8.3);a6b…	Chk1/Chk2(Cds1) mediated inactivation of Cyclin B:Cdk1 complex_Homo sapiens_R-HSA-75035(9.8);Activation of BAD and translocation to mitochondria_Homo sapiens_R-HSA-111447(9.5);Activation of BH3-only proteins_Homo sapiens_R-HSA-114452(8.6);Intrinsic Pathway for Apoptosis_Homo sapiens_R-HSA-109606(8.1);Translocation of GLUT4 to the plasma membrane_Homo sapiens_R-HSA-1445148(7.6);
308	3	0
309	3	0	BREAST(3.5);
428					225	31
331					12	788
495					253	147
363						13
458						860
456						8
452						687
450						28
350						538
352						7
356						436
357						148
358						977
359						103
515						2
513						5
368						33
336						31
454						111
444						86
446						2
442						11
443						41
360						142
412						95
424						339
410						43
526						2
417						6
449						6
416						2
470						20
475						71
474						1
477						22
479						5
373						10
371						529
376						30
377						569
516						3
351						1
374						2
465						28
468						1670
469						2
391						5
387						2
386						5
385						56
384						82
383						49
380						33
525						45
389						7
489						1
347						651
318						257
314						1
315						8
316						206
317						2
310						54
311						69
312						27	RAD51AP2(3.9)
313						117
413						3
414						4
419						561
394						2
396						761
392						159
491						1126
496						13
494						46
372						176
324						47
328						2
400						692
401						2
403						33
404						81
405						39
408						58
409						356
527						1
524						4
521						20
481						12
483						227
436						125
485						4
335						132
333						24
339						359
435						12
322						267
431						2
430						23
433						3
432						19
448						6
438						55
422						414
427						4
425						317
342						12
341						107
340						35
344						226
348						40
505						1
367						21
519						5
